1 **Alternative splicing preferentially increases transcript diversity associated with stress responses in the**  
2 **extremophyte *Schrenkiella parvula***

3  
4 **Running title: Splicing increases isoform diversity under stress**

5  
6  
7 Chathura Wijesinghege, Kieu-Nga Tran, Maheshi Dassanayake\*

8  
9 Department of Biological Sciences, Louisiana State University, Baton Rouge, LA 70803, USA

10 \*Address correspondence to: [maheshid@lsu.edu](mailto:maheshid@lsu.edu)

11  
12  
13  
14  
15  
16  
17  
18  
19  
20  
21  
22  
23  
24  
25  
26  
27  
28  
29  
30  
31  
32  
33  
34  
35  
36

## 37 **Abstract**

38           Alternative splicing extends the coding potential of genomes by creating multiple isoforms from one  
39 gene. Isoforms can render transcript specificity and diversity to initiate multiple responses required during  
40 transcriptome adjustments in stressed environments. Although the prevalence of alternative splicing is widely  
41 recognized, how diverse isoforms facilitate stress adaptation in plants that thrive in extreme environments are  
42 unexplored. Here we examine how an extremophyte model, *Schrenkiella parvula*, coordinates alternative  
43 splicing in response to high salinity compared to a salt-stress sensitive model, *Arabidopsis thaliana*. We use  
44 Iso-Seq to generate full length reference transcripts and RNA-seq to quantify differential isoform usage in  
45 response to salinity changes. We find that single-copy orthologs where *S. parvula* has a higher number of  
46 isoforms than *A. thaliana* as well as *S. parvula* genes observed and predicted using machine learning to have  
47 multiple isoforms are enriched in stress associated functions. Genes that showed differential isoform usage  
48 were largely mutually exclusive from genes that were differentially expressed in response to salt. *S. parvula*  
49 transcriptomes maintained specificity in isoform usage assessed via a measure of expression disorderdness  
50 during transcriptome reprogramming under salt. Our study adds a novel resource and insight to study plant  
51 stress tolerance evolved in extreme environments.

52 Keywords: Extremophyte, Salt stress, Alternative splicing, Disorderdness of transcripts, Isoform usage

53

## 54 **Introduction**

55           Alternative splicing produces different mature RNAs from a single gene. Its impact on increasing  
56 transcript diversity has continued to broaden our understanding of gene regulatory mechanisms since it was  
57 first observed in 1977<sup>1,2</sup>. The potential to create novel transcript diversity via alternative splicing is immense.  
58 The *Drosophila DSCAM* gene, which functions as an axon guidance receptor, is an extreme example of  
59 alternative splicing. It contains 115 exons and is estimated to give rise to more than 38,000 isoforms that are  
60 spatiotemporally regulated to achieve specific regulation in *Drosophila* neural development<sup>3,4</sup>. Alternative  
61 splicing events can be observed in more than 95% of human genes<sup>5</sup>. High throughput proteomics and  
62 ribosome bound mRNA sequencing (Ribo-Seq) studies show that a significant fraction of alternative splice  
63 variants are translated into protein isoforms<sup>6,7</sup>. Additionally, an ever-increasing array of transcriptome  
64 sequencing has revealed the existence of novel non-coding RNAs generated through alternative splicing  
65 suggesting their importance in gene regulatory circuits in all eukaryotic clades<sup>8,9</sup>. Differential splicing in  
66 closely related species have shown to reflect their divergent adaptive strategies not readily detectable at the  
67 primary gene expression level<sup>10</sup>. Tissue- and species-specific splicing is more divergent than promoter level  
68 divergence among closely related species facilitating independent evolutionary trajectories fitting to each  
69 species as highlighted by Calarco et al.<sup>11</sup> Therefore, genome wide discovery of new transcripts produced via  
70 alternative splicing becomes a critical initiative to understand the diversity of gene products and systematically  
71 assess their role in evolutionary innovations.

72 Alternative splicing increases proteome diversity as well as regulatory complexity in plants<sup>12-14</sup>. In  
73 the model plant *Arabidopsis thaliana*, majority of the genes (>60%) undergo alternative splicing. There are  
74 more than 70,000 non-redundant transcript isoforms reported for *A. thaliana*<sup>15,16</sup>. Similar reports on maize<sup>17</sup>,  
75 sorghum<sup>18</sup>, and cotton<sup>19</sup> demonstrate that alternative splicing is prevalent in plants. Differential splicing has  
76 also been targeted in crop breeding as shown with sunflowers<sup>20</sup>.

77 Large scale changes in alternative splicing have been reported to allow transcriptional adjustments in  
78 response to abiotic stresses including salt<sup>21</sup>, cold<sup>22</sup>, hypoxia<sup>23</sup>, and heat stress<sup>24</sup>. Targeted functional studies  
79 have also highlighted the significance of alternative splicing in responses to abiotic stresses. For example, the  
80 heat shock protein gene, *hsf2* in *A. thaliana* produces an alternatively spliced transcript resulting in a truncated  
81 protein that in turns binds to the *hsf2* promoter to enhance transcription of *hsf2* during heat stress<sup>25</sup>. While the  
82 majority of published studies converge on alternative splicing being a key mechanism for environmental stress  
83 adaptation in plants, such studies are limited to abiotic stress sensitive crop models or to *A. thaliana*.

84 Compared to crop plants, extremophytes that are naturally found in extreme environments are  
85 equipped with evolutionary innovations that give them the ability to cope with multiple and extreme levels of  
86 environmental stresses<sup>26</sup>. Therefore, extremophytes could show how the expanded transcriptome diversity via  
87 alternative splicing may render additional paths for abiotic stress adaptations absent in stress sensitive models.  
88 In this study, we have used the extremophyte model, *Schrenkiella parvula* (formerly *Thellungiella parvula* and  
89 *Eutrema parvulum*)<sup>27,28</sup>. to examine its transcriptome diversity augmented by alternative splice variants. *S.*  
90 *parvula* shares a highly co-linear genome with *A. thaliana*<sup>29,30</sup>. Yet, *S. parvula* is uniquely adapted to multiple  
91 abiotic stresses reflecting its natural habitats often associated with hypersaline lakes in the Irano-Turanian  
92 region<sup>31,32</sup>.

93 Previous studies have shown that the *S. parvula* genome is enriched with duplicated genes associated  
94 with abiotic stress responses and stress responsive genes show constitutive high expression as a stress  
95 preadaptation compared to *A. thaliana*<sup>29,32,33</sup>. Alternative splicing plays a complementary role to gene  
96 duplications and provides an additional path to increase transcript diversity<sup>34</sup>. Therefore, we aimed to test the  
97 overall hypothesis that alternative splicing leads to increased diversity of stress responsive transcripts in *S.*  
98 *parvula*.

99 In this study we investigated the complexity of the alternative splicing landscape in roots and shoots in  
100 response to salt stress and how alternative splicing may provide transcript diversity associated with adaptations  
101 to environmental stress in the model extremophyte *S. parvula*. We used PacBio Iso-Seq sequencing to identify  
102 and annotate alternative splice variants and Illumina short reads to quantify isoform abundance. We find that  
103 the *S. parvula* transcriptome is enriched in stress-associated isoforms. It shows specific isoform usage in a less  
104 disordered state compared to the stress-sensitive model *A. thaliana* in response to high salinity.

## 105 **Materials and Methods**

### 106 **Plant material**

107 *Schrenkiella parvula* (ecotype Lake Tuz, Turkey; Arabidopsis Biological Resource 575 Center/ABRC  
108 germplasm CS22663) seeds were grown hydroponically as previously described<sup>33</sup>. Briefly, plants were grown  
109 at a light/dark cycle of 12/12 hr, 100 - 120 mM·m<sup>-2</sup>·s<sup>-1</sup> photon intensity, 20-22 °C, and 1/5<sup>th</sup> Hoagland's  
110 solution for four weeks. These were treated with a with a combination of 250 mM NaCl, 250 mM KCl, 30 mM  
111 LiCl, and 15 mM H<sub>3</sub>BO<sub>3</sub> for three days to generate tissue samples used to create a reference transcriptome with  
112 PacBio Iso-seq sequencing. Shoots and roots were harvested separately. RNA was extracted using QIAGEN  
113 RNeasy Plant Mini Kit (QIAGEN, Hilden, Germany) with column digestion to remove DNA contamination.  
114 About 4 µg of total RNA per tissue type at a quality of RNA integrity number ≥ 8 based on a Agilent 2100  
115 Bioanalyzer (Agilent Technologies, CA, USA) were used to generate RNA-Seq libraries.

116 Shoot and root (1 µg) extracted as described above were used for cDNA synthesis using the  
117 SuperScript cDNA Synthesis Kit (Invitrogen, Massachusetts, USA) following manufacturer's instructions to  
118 test the presence of multiple isoforms independent from Iso-Seq for a randomly selected gene set expected to  
119 express multiple isoforms. Isoform specific PCR primers (Supplementary Table 1) that span the alternative  
120 splice sites were designed to use with an amplification protocol (initial denaturation at 95 °C for 3 min; 30  
121 cycles of 95 °C for 30 s, 50-56 °C for 30 s, 72 °C for 2.30 to 3 min ; 72 °C for 10 min) run on a Bio-Rad T100  
122 Thermal Cycler (Hercules, CA, USA) with a PCR Master mix Solution i-MAX II (iNtRON Biotechnology, S  
123 Korea). PCR products were separated on a 1% agarose gel.

124 To quantify isoform abundance in response to high salinity compared to control conditions, RNA was  
125 extracted from hydroponically grown *S. parvula* and *A. thaliana* (Col-0) as described in Tran et al. (2021).  
126 These plants were treated with 150 mM NaCl for 24 hours and harvested together with samples hydroponically  
127 grown without added NaCl as a control condition. The hydroponic growth conditions except for the specific  
128 salt treatment was kept equivalent to growth conditions given to plants used for reference transcript generation  
129 with Iso-Seq. At least 5 plants were used per biological replicate and three biological replicates were used for  
130 each root and shoot sample for *S. parvula* and *A. thaliana* to yield a minimum of 1 µg of total RNA per sample  
131 used for standard RNA-seq library preparation.

132

### 133 **Transcriptome sequencing**

134 For Iso-Seq based long read sequencing, cDNA synthesis, sequencing library preparation, and PacBio  
135 sequencing were conducted at the Arizona Genomics Institute, University of Arizona, USA. Two Iso-seq  
136 sequencing SMRT libraries were constructed following size selection from ≤ 4 kb and ≥ 3.5 kb per each tissue  
137 and ran on two Pacific Biosciences Sequel cells with v2.1 Chemistry. For RNA-seq based short read  
138 sequencing, mRNA enriched cDNA synthesis, library preparation, and sequencing were conducted at the Roy  
139 K. Carver Biotechnology Center, University of Illinois Urbana-Champaign, USA. Briefly, True-Seq strand  
140 specific libraries (Illumina, San Diego, CA, USA) were multiplexed and sequenced on an Illumina HiSeq4000  
141 platform to generate >15 million 50-nucleotide single-end reads per sample.

142

## 143 **Identification and annotation of full-length transcript models for *S. parvula***

144 Raw Sequel data were processed using isoseq\_sa5.1 pipeline  
145 ([https://github.com/PacificBiosciences/IsoSeq\\_SA3nUP](https://github.com/PacificBiosciences/IsoSeq_SA3nUP)). Circular consensus sequences (CCS) were generated  
146 from subread BAM files with following parameters: minLength=50, -noPolish --minLength=50, --  
147 maxLength=15000, --minPasses=1, --minPredictedAccuracy=0.8, --minZScore=-999 --maxDropFraction=0.8.  
148 CCS reads were selected as full length reads if it contained the 5' and 3' primers and a poly(A) signal  
149 preceding the 3' primer without additional copies of adapters. The full length consensus transcripts were  
150 further clustered using ICE (Iterative Clustering for Error Correction) to obtain high-quality isoforms with  
151 post-correction accuracy above 99% using Quiver. Error corrected full length reads were mapped to the  
152 *Schrenkiella parvula* reference genome v2.2 (Phytozome genome ID: 574) to annotate isoforms assigned to  
153 gene models and further select a set of high confidence transcript models. An isoform is annotated as a full  
154 length transcript mapped to a genomic locus that has a single gene model assigned. If more than one isoform is  
155 mapped to a gene model, the second and subsequent isoforms are considered products of alternative splicing.  
156 First, TAPIS<sup>17</sup> was used to map isoforms and further error correct the isoforms. To map reads to the genome  
157 GMAP<sup>36</sup> was used with parameters, --no-chimeras, --cross-species --expand-offsets 1, -K 3000. Then,  
158 SQANTI<sup>37</sup> was used with default parameters to identify the isoform that matched the primary gene model in  
159 the genome and to assign additional isoforms that may be derived from that gene model as alternatively spliced  
160 isoforms if both types of full-length isoforms were present in our processed full length data. Canonical splice  
161 sites were defined as AG at the acceptor site and GT at the donor site. All the other splice sites were  
162 categorized as non-canonical splice sites. Custom python script was used to count canonical and non-canonical  
163 splice sites. Finally, we selected non-redundant structurally distinct isoform models that also contained a  
164 complete and uninterrupted open reading frame as a selected set of putative protein coding transcript models.  
165 Only isoforms that are likely to code for proteins were used for downstream analyses in the current study due  
166 to the high uncertainty of functional significance and limited annotation resources available for newly  
167 identified non-coding isoforms.

168 Functional annotations were assigned using PANTHER<sup>38</sup> and *A. thaliana* Gene Ontology (GO)  
169 annotations (version release date 2020-07-16; DOI:10.5281/zenodo.3954044). Test for enriched functions were  
170 performed using BiNGO<sup>39</sup>. Further clustering of enriched functions were performed using GOMCL<sup>40</sup> (with  
171 parameters: -gosize 1500 -Ct 0.7 -I 1.5 -hm -nw -d -hg 0 -hgt -ssd) to get a non-redundant set of representative  
172 functional annotations at p-values  $\leq 0.05$  adjusted for false discovery rate.

173

## 174 **Transcript and gene expression quantification**

175 Following quality checks using FastQC (<http://www.bioinformatics.babraham.ac.uk/projects/fastqc/>).  
176 RNA-seq reads were mapped to gene models for *A. thaliana* (TAIR10) or *S. parvula* (Reference v2.2) as well  
177 as transcript models obtained from AtRTD2<sup>41</sup> or *S. parvula* Iso-seq supplemented transcript models using  
178 Salmon<sup>42</sup> with parameters, "--type quasi -k 31" for indexing and "--gcBias -l A" for quantification. Ortholog

179 pairs between *S. parvula* and *A. thaliana* were assigned based on Oh & Dissanayake 2019<sup>43</sup>. RNA-seq reads  
180 mapped to gene models were used to identify differently expressed genes. A custom python script was used to  
181 count uniquely mapped reads to each gene model. Differentially expressed genes between control and salt  
182 treatments within each species were identified using DESeq2<sup>44</sup>. RNA-seq reads mapped to transcript models  
183 were used for generating expression values for isoforms as well as quantify alternative splicing event  
184 frequency. Expression counts for isoforms were converted to TPM (Transcript Per Million) and in  
185 comparisons where an isoform was counted as expressed had  $\geq 0.5$  TPM normalized expression per isoform  
186 independent from the expression quantified at the gene level. Isoform ratio per ortholog pairs was calculated  
187 based on the number of isoforms per *S. parvula* ortholog divided the number of isoforms detected in the *A.*  
188 *thaliana* ortholog.

189 Differential splicing was assessed using SUPPA2<sup>45</sup>. Briefly, alternative splice events were identified  
190 using generateEvents program and differential isoform expression was calculated based on the total expressed  
191 number of isoforms per gene using psiPerIsoform included in SUPPA2 together with diffSplice to compare  
192 differences in isoform expression between two conditions.

193

#### 194 **Shannon entropy calculation for isoform specific transcriptome responses**

195 Isoform expression shifts between conditions or species were quantified using PSI values (proportion of  
196 spliced isoforms) assigned for each alternatively spliced isoform per gene as given in the equation below. We  
197 used the PSI values to calculate Shannon entropy per gene as described by Ritchie et al. (2008)<sup>46</sup> and used  
198 normalized values between 0 and 1 for between species comparisons as described in Kumar et al. (1986)<sup>47</sup>

$$PSI_{isoform\ i\ of\ GeneA} = \frac{TPM_{isoform\ i\ of\ GeneA}}{\sum TPM_{all\ isoforms\ of\ GeneA}}$$

$$Normalized\ Shannon\ entropy_{GeneA} = -\frac{1}{\log N} \sum_{i=1}^{N=\# \text{ of isoforms of GeneA}} PSI_{isoform\ i} (\log PSI_{isoform\ i})$$

199 We calculated Shannon entropy values for genes expressed in control and salt treated samples for *S.*  
200 *parvula* and *A. thaliana*. Genes with PSI values less than 0.01 or higher than 0.99 (expected when an isoform  
201 is rarely expressed or dominates approximating zero alternative splicing for that gene) were removed from our  
202 analysis to test for isoform expression shifts. Further, gene models which were not represented by at least two  
203 isoforms were removed from the analysis.

204

#### 205 **Splice site prediction for the *S. parvula* genome**

206 We used a deep-neural network, SpliceAi<sup>48</sup> to predict genome wide splice sites for *S. parvula* from  
207 primary gene model sequences. The network model was trained first with *A. thaliana* gene models from  
208 chromosome 1 to 4 and validated with chromosome 5 gene models described in Araport11<sup>49</sup>. We provided

209 200 nucleotides upstream and downstream of a given base scanning all bases per gene in all genes models to  
210 predict whether that site is a splice site donor, acceptor or not a splice site. Model prediction was assigned a  
211 probability score between 0 and 1 for a given site with values closer to 1 representing the probability of that  
212 site being a splice site. We used a probability score of  $\geq 0.6$  for the selection of potential splice sites. We used  
213 this trained network to predict splice sites for the *S. parvula* genome v2. We compared the predicted splice  
214 sites to observed splice sites and identified new splice sites. If new splice sites were predicted for a gene model  
215 we had identified more than one isoform, the prediction of a novel splice site or sites for that gene was  
216 considered as one additional predicted putative isoform.

217

## 218 **Results**

### 219 **Improvement of isoform annotation in *S. parvula***

220 Prior to this study, the *S. parvula* reference gene models (v2.2) were predicted based on *ab initio*  
221 methods as well as RNA-seq evidence based prediction derived from non-stressed conditions<sup>29</sup>. To maximize  
222 the identification of transcripts that may be conditionally expressed under stress, we used 4-week-old *S.*  
223 *parvula* plants treated with multiple salts (NaCl, KCl, LiCl, and H<sub>3</sub>BO<sub>3</sub>) that are found at high levels in its  
224 native soils<sup>50</sup> for PacBio Iso-Seq sequencing. We obtained 500,265 error corrected circular consensus  
225 sequences (CCS) as our primary source of sequence reads to create an isoform specific reference transcriptome  
226 and to supplement the genome-based transcript annotation for *S. parvula*. We identified putative full-length  
227 transcripts based on 338,812 high quality CCS reads that contained 5' and 3' primers and polyA tails (Figure  
228 1A). Following iterative clustering, error correction, and mapping to the *S. parvula* reference genome, we  
229 annotated 16,828 (corresponding to 11,348 genomic loci) structurally distinct putative protein coding  
230 transcripts expressed in *S. parvula* tissues exposed to multiple salts (see Methods for details). This added 7,732  
231 new protein coding transcript models to the *S. parvula* reference genome to provide a total of 34,582 reference  
232 protein coding transcripts (Table 1).

233 We were able to improve the *S. parvula* reference genome to include full length transcripts inclusive  
234 of 5' and 3' UTR regions with Iso-Seq reads. The average length of new Iso-Seq supported reference transcript  
235 models was greater than the corresponding length of transcript models in the *S. parvula* v2.2 reference genome  
236 annotation (Fig. 1B). The increase in transcript lengths was largely due to the identification of 5' and 3' UTR  
237 sequences that were previously missed in transcript model predictions in the reference genome. This  
238 refinement of reference transcript models generated UTR length distribution comparable to that of *A. thaliana*  
239 reference genome (Araport11) (Figure S1) and significantly increased the percentage of standard RNA-seq  
240 reads mapped to the reference transcriptome (Fig. 1C). This is expected to improve estimates of gene  
241 expression counts when using short-read RNA-seq data.

242 New genes previously not reported for *S. parvula* was added with Iso-Seq supported transcripts. The  
243 current reference *S. parvula* v2.2 genome includes 26,847 total protein coding primary gene models. The Iso-  
244 Seq supported transcripts mapped to 11,348 (42%) of those genes (Table 1). We additionally identified 301

245 novel gene models that were missed (i.e. sequence present in the genome but annotation absent) in the *S.*  
246 *parvula* reference genome. For example, the putative ortholog of the Arabidopsis *Magnesium/proton*  
247 *exchanger* (*MHX*, similar to *At2G47600*) in the *S. parvula* genome was annotated on chromosome 4 between  
248 *Sp4g29520* and *Sp4g29540*, using an Iso-seq based transcript model detected in this study (Figure S2). The  
249 novel transcript models further improved the reference genome annotation by adding multiple isoforms  
250 assigned to gene models, alternative transcription start and end sites for existing models, and UTR sequences  
251 (Table 1). The improved gene models, isoform specific expression, and Iso-Seq reads are available at  
252 Bioproject ID PRJNA63667.

253 We identified 5,911 alternatively spliced events, resulting in structurally different protein coding  
254 regions from the primary transcript models in the *S. parvula* genome from this study. These splice variants  
255 were categorized into intron retention, alternative 3' acceptor, alternative 5' donor, exon skipping, use of  
256 alternative first exon, use of alternative last exon, and use of mutually exclusive exons based on their  
257 frequency (Table 2). Intron retention was the most prevalent (55.2%) alternatively spliced event in *S. parvula*.  
258 We observed that two or more distinctly spliced isoforms could be co-expressed in either shoots or roots  
259 (Figure S3) when multiple isoforms were checked for their expression using RT-PCR for a select set of genes.

260

### 261 **Salt stress associated genes show a higher isoform diversity in *S. parvula* compared to *A. thaliana***

262 Alternative splicing can increase the repertoire of transcripts that are available to respond to abiotic  
263 stresses more efficiently and dynamically, independent of gene copy number variation<sup>51</sup>. Therefore, we  
264 hypothesized that *S. parvula* would have a higher diversity of alternatively spliced isoforms for genes related  
265 to abiotic stress tolerance, specifically salinity tolerance, than in the less-tolerant species *A. thaliana*. To test  
266 this, we calculated the isoform ratio per ortholog pair in *S. parvula* and *A. thaliana* using the *S. parvula*  
267 reference isoforms identified in this study and *A. thaliana* reference isoforms obtained from AtRTD2 database  
268<sup>16</sup>. To avoid missing data or lack of expression of a certain gene in mature shoots or roots in one species being  
269 inferred as lack of isoform diversity in that species, we limited our comparison to genes expressed in our study  
270 that were represented by at least one transcript model in both species. We identified 10,859 *A. thaliana* - *S.*  
271 *parvula* ortholog pairs that had one or more isoforms per ortholog in each species (Figure 2A; Supplementary  
272 Table 2). Among them there were 6,874 ortholog pairs showing more isoforms in *A. thaliana* while only 1,201  
273 pairs had a higher isoform number in *S. parvula* (Fig. 2A). Ortholog pairs annotated as “Response to stress”  
274 (GO:0006950) and “Transport” (GO:0006810) had a higher isoform diversity in *S. parvula*, while ortholog  
275 pairs annotated under “Nitrogen metabolism” (GO:0034641) had a higher isoform diversity in *A. thaliana* (Fig.  
276 2B). As a control, we examined the distribution of isoforms in all ortholog pairs and found that these  
277 distributions were not significantly different between the two species (Fig. 2B).

278 The genes that had a higher isoform diversity in *S. parvula* included some of the most highly  
279 conserved and key stress responsive genes in plants including the Na<sup>+</sup>/H<sup>+</sup> antiporter, *SOS1* known for its role  
280 in excluding Na<sup>+</sup> from roots during salt stress<sup>52</sup> and *P5CS1* that codes for delta1-pyrroline-5-carboxylate



281 synthase, the rate-limiting enzyme in proline biosynthesis known for its role in oxidative and osmotic stress  
282 responses<sup>53</sup>. Notably, both *SOS1* and *P5CS1* are represented by single copy orthologs in *S. parvula* and *A.*  
283 *thaliana*. Five *SOS1* (out of 8 detected) and 8 *P5CS1* (out of 22 detected) isoforms for *S. parvula* were  
284 expressed at  $\geq 0.5$  TPM in both shoots and roots in control as well as salt treated conditions (Figure S4). The  
285 AtRTD2 database reported three *SOS1* and six *P5CS1* isoforms for *A. thaliana*<sup>16</sup>.

286

### 287 **Isoform usage is less disordered in *S. parvula* compared to *A. thaliana* during salt stress**

288 Diversity and conditional expression (i.e. specificity) of isoforms can be assessed using the Shannon  
289 entropy based information theory applied to transcriptomes<sup>54</sup>. Stressed compared to growth optimal conditions  
290 are known to have higher transcriptome entropy and disorderdness with an increased number of alternative  
291 splice events when assessed using Shannon Entropy<sup>46</sup>. We hypothesized that *S. parvula* transcriptomes will  
292 show a smaller entropy increase in its isoform usage when transitioning from control to salt stressed treatments  
293 compared to the salt-sensitive model *A. thaliana*. To test if isoform usage from control to stressed conditions  
294 went through a measurable entropy transition distinctive of the species, we used RNA-seq data from root and  
295 shoot samples to quantify the isoform abundance in *S. parvula* and *A. thaliana* and calculated the Shannon  
296 entropy (see Methods). We used *A. thaliana*-*S. parvula* ortholog pairs that were represented by at least two  
297 expressed isoforms with a normalized expression  $\geq 0.5$  TPM per ortholog within a species to avoid incomplete  
298 comparisons due to rare isoforms difficult to quantify in one species. This resulted in a total of 1,678 and 1,592  
299 ortholog pairs expressed in roots and shoots. Roots had 3,832 and 5,239 isoforms for *S. parvula* and *A.*  
300 *thaliana* while shoots had 3658 and 4431 isoforms respectively. We found that both *S. parvula* and *A. thaliana*  
301 root transcript distributions increased mean entropy in response to salt stress (Figure 3A). This is aligned with  
302 the expectation that stress conditions create higher transcript diversity, lower specificity, and more  
303 disorderdness in transcript expression compared to a stress-neutral control condition<sup>55</sup>. *A. thaliana* shoots  
304 showed a significant increase in entropy when transitioning from control to salt stressed conditions (Fig. 3A).  
305 The change in entropy for *S. parvula* was less in both roots and shoots suggesting a less disordered state of  
306 isoform usage compared to the relatively stress-sensitive *A. thaliana* when responding to stress conditions. We  
307 observed that the isoform usage in response to salt was highly species specific. The number of ortholog pairs  
308 that showed increased or decreased isoform usage as a shared response to salt stress in both species roots (156  
309 expressed orthologs) and shoots (142 expressed orthologs) were much fewer than those orthologs (977 in roots  
310 and 937 shoots) that had a specific usage change in one species (Fig. 3B). Orthologs that showed high isoform  
311 usage specificity (i.e. maintained or lowered entropy) in response to salt stress in *S. parvula* roots compared to  
312 *A. thaliana* were enriched in functions largely associated with salt stress (Fig. 3C). In shoots, genes that  
313 maintained isoform usage specificity under salt stress in both species were enriched in salt stress associated  
314 functions (Fig. 3C).

315

### 316 **Distinct regulation between different isoform usage and differential expression in response to salt stress**

317 We next examined if the differently expressed genes in response to salt stress were also subjected to  
318 changes in their isoform usage under high salinity. Supplementary Table 3 lists all genes identified as  
319 differently spliced or differently expressed. Genes that were differently expressed as well as differently spliced  
320 in response to salt stress were rare in *S. parvula* and *A. thaliana* ( $\leq 3\%$ ) (Figure 4A). Moreover, the shared  
321 orthologs that were differently spliced in response to salt stress between species either in roots or shoots were  
322 also low ( $\sim 3\%$ ) (Fig. 4B). Multiple genes differently expressed under salt stress in *A. thaliana* are found to be  
323 only differently spliced in response to salt in *S. parvula* (Supplementary Table 3). Figure S5 further highlights  
324 the high degree of species-specific regulation in differential isoform usage in response to stress. However,  
325 there is high convergence in the enriched functions represented by differently spliced isoforms in response to  
326 salt stress in both species (Fig. 4C).

327

### 328 **Non-canonical splice sites are enriched in stress associated genes**

329 Majority of splice sites in plants are marked by GU at the 5' and AG at the 3' sites in introns<sup>56</sup>.  
330 Although less common, plant genes are spliced at alternative sites termed as non-canonical splice sites and  
331 alternative splicing at non-canonical sites are associated with abiotic stress responses<sup>56-58</sup>. We investigated  
332 whether the expression of transcripts with non-canonical splice sites (Supplementary Table 4) increased under  
333 salt stress in *S. parvula* compared to *A. thaliana*. We found that *S. parvula* did not show any significant  
334 difference in mean expression strength between non-canonical and canonical transcripts in both roots and  
335 shoots while *A. thaliana* shoots showed an increased expression in transcripts that had non-canonical splice  
336 sites when treated with salt (Figure 5A).

337 Previous studies have reported increases in non-canonical splicing in plants under abiotic stresses<sup>59,60</sup>.  
338 Therefore, we examined if usage of transcripts with non-canonical splice sites significantly increased under  
339 salt stress compared to control conditions in *S. parvula* differently from *A. thaliana*. Similar to previous  
340 reports, non-canonically spliced transcripts are less frequent than canonically spliced transcripts regardless of  
341 the condition tested ( $\leq 10\%$ ; Fig. 5B). However, our analysis does not find a significant increase in non-  
342 canonically spliced isoforms from control to salt treated conditions in either species (Fig. 5B).

343 Next, we tested if genes with non-canonical splice sites were enriched for stress associated functions  
344 in *S. parvula*. We found 424 genes out of 25,145 multi-exon coding genes to be enriched in non-canonical  
345 splice sites in the *S. parvula* genome (Fig. 5C). Some of these are notable genes associated with stress  
346 regulatory pathways (for example, *PAL1*, *PAL2*, *P5CS1* and *HSC70-1*) (Fig. 5C). *S. parvula* genes enriched for  
347 non-canonical splice sites were indeed primarily enriched in stress response pathways (Fig. 5D). Further sub-  
348 clustering of the functional group annotated under "stress responses" (cluster C1 of Fig. 5D) showed that genes  
349 in salt/metal ion and osmotic stress were specifically contributing to this cluster.

350

### 351 **Predicted isoforms for the *S. parvula* genome is enriched for stress responsive genes**

352 It is likely that we may have missed to detect stress responsive isoforms expressed in *S. parvula* in this

353 study because exhaustive searches for conditionally expressed isoforms are impractical for emerging model  
354 organisms. Therefore, we sought to employ a machine learning approach to predict alternative splicing sites in  
355 the *S. parvula* genome as an alternative. We applied the deep neural network, SpliceAI which is expected to  
356 yield high confidence predictions among recent tools developed to predict splice events using genomic  
357 sequences<sup>48,61,62</sup>. We used the known splice site information from *A. thaliana* chromosomes 1-4 to train the  
358 SpliceAI network and received an average precision of 0.92 when tested with *A. thaliana* chromosome 5  
359 (Figure 6A). We then predicted splice sites from 26,847 *S. parvula* pre-mRNA sequences and obtained  
360 214,901 splice site predictions including 114,284 novel splice sites (Fig. 6B). Twenty-six percent of splice  
361 sites previously observed were also predicted using SpliceAI and we found 7,302 genes with at least one  
362 newly, predicted isoform. Prediction probability scores were highest for splice sites within the gene compared  
363 to those in the first and the last introns (Figure S6).

364 With the current analysis, we have identified 16,061 potential protein coding isoforms (observed or  
365 predicted) for 9,033 genes in the *S. parvula* genome (Supplementary Table 5). Interestingly, stress and  
366 transport associated functions are enriched among those genes that are observed or predicted to have more than  
367 one isoform (Fig. 6C). Stress and transport related functions deduced from GO annotations account for 35% of  
368 genes that are alternatively spliced in the *S. parvula* genome.

369  
370 **Discussion**  
371 **Alternative isoforms of stress related genes from an extremophyte model as a resource in environmental**  
372 **stress adaptations**

373 Alternative splicing allows genes to acquire new functions independent from gene duplications and  
374 promoter evolution. Previous studies have shown that duplicated genes are enriched in stress associated  
375 functions in *S. parvula* and other extremophytes facilitating their stress adapted lifestyles more than in stress-  
376 sensitive sister species<sup>29,63,64</sup>. However, extremophyte gene diversity represented by alternatively spliced  
377 isoforms is underexplored<sup>65</sup>. Certain genes are regulated only at the alternative splicing level with no change  
378 at the gene expression level that have led to the increasing recognition of the importance of isoform specific  
379 reference transcript datasets in gene expression studies<sup>66</sup>. In this study we examined the possibility of  
380 diversifying gene functions through alternative splicing and specially focused on isoforms differently used  
381 during salt stress in one of the leading model extremophytes<sup>26</sup>.

382 *Schrenkiella parvula* and *A. thaliana* genomes have similar gene numbers (~27,000) and similar  
383 genome sizes (~120 MB)<sup>29</sup>. A recent study that explored alternative splicing in *A. thaliana* using full length  
384 transcript sequencing based on Iso-Seq reports the discovery of isoforms in similar proportions to our study  
385 with intron retention being the most common alternative splicing event<sup>67</sup> (Table 2). This suggests that *S.*  
386 *parvula* is not an exception in highly increased or decreased transcript diversity through alternative splicing  
387 although the recorded number of isoforms for the model plant through aggregate studies using multiple tissues,  
388 developmental stages, and treatments are much higher (Zhang et al., 2017). Given the genomic similarities

389 between *S. parvula* and *A. thaliana*, their transcriptome adjustments with differential splicing in response to  
390 salt stress were remarkably distinct from one another when an identical salt treatment was given to mature  
391 plants (same age and tissues tested in both species) (Figs. 4 and S5).

392 In support of our hypothesis that extremophytes would diversify their response to stress via alternative  
393 splicing in selected gene groups, we observed that *S. parvula* orthologs had a higher number of isoforms  
394 compared to *A. thaliana* in genes associated with stress and transport functions (Fig. 2). Stress and transport  
395 functions were also enriched among duplicated genes in *S. parvula* compared to *A. thaliana*<sup>68</sup>. We found that  
396 differently expressed genes and genes that showed differential isoform usage were largely mutually exclusive  
397 within species as well as in one-to-one ortholog pairs between *S. parvula* and *A. thaliana* (Figs. 4 and S5).  
398 Further, when we combine both observed and predicted splice sites in the *S. parvula* genome, the potential  
399 protein coding isoform pool is enriched in functions associated with stress tolerance (Fig. 6). These  
400 observations together indicate that genes expressed in response to stress are highly diversified and non-  
401 overlapping in their mode of function, but converge on common functions associated with stress tolerance in *S.*  
402 *parvula*. Therefore, our study provides a novel resource for assessing functional significance of stress tolerance  
403 genes in the extremophyte model. It allows selection of target genes that could be tested at the isoform level  
404 when expression modulation via promoter modifications or single gene-knockouts of essential genes do not  
405 offer optimal methods to test novel gene functions contributing to stress tolerance.

406

#### 407 **Isoform usage and the specificity of their expression in response to salt**

408 Our current study in agreement with a previous study on *A. thaliana* have shown that most differently  
409 spliced genes were not differently expressed in response to salt stress representing an independent layer of  
410 gene regulation in response to stress<sup>21</sup>. Compared to animals, plants tend to use alternative splicing biased to  
411 environmental stress responses more than for tissue-specific responses<sup>69</sup>. Multiple studies have reported  
412 specific associations of alternative splicing and environmental stress in plants<sup>22,57,59,70,71</sup>. However, fewer  
413 studies have examined the presence of non-specific alternative splicing leading to increased number of  
414 differently spliced isoforms under abiotic stress<sup>12,72</sup>. Additionally, components of the spliceosome are  
415 differently expressed leading to differential splicing of target genes in *A. thaliana* during stress conditions<sup>60</sup>.  
416 In animals, stressed conditions are reported to have increased amount of alternatively spliced isoforms with  
417 high non-specific expression, thus creating a higher level of disorderdness in isoform expression<sup>46</sup> which can  
418 be quantified using Shannon entropy<sup>73,74</sup>. We predicted that plants will show a similar trend in increased  
419 disorderdness in isoform expression at the transcriptome level during stress conditions. Furthermore, we  
420 expected to see a smaller change in entropy in the extremophyte when transitioning to a salt treated condition  
421 compared to the stress-sensitive species. Indeed, this prediction was supported by the shoot transcriptomic  
422 response we observed for *S. parvula* and *A. thaliana* (Fig. 3). Notably, the genes that shifted to lower entropy  
423 values representing shifts to specific isoform in their expression specificity under stress were enriched for  
424 stress associated functions in both roots and shoots in *S. parvula* (Fig. 3). Our study cannot test if the tendency

425 to increase transcriptome disorderdness via less specifically expressed isoforms per gene is indicative of  
426 aberrant splicing under stress. Yet, the comparison between *S. parvula* and *A. thaliana* suggests that the  
427 extremophyte is more prepared to respond to salt stress by specific isoforms mostly expressed for stress  
428 associated genes.

429 In conclusion, this study provides a novel resource for a leading extremophyte model and expands our  
430 knowledge on the ability to respond to stress via differential isoform usage independently from differential  
431 gene expression. Stress associated functions were enriched among genes observed or predicted to have  
432 multiple isoforms in *S. parvula*; one-to-one orthologs where *S. parvula* has a higher number of isoforms than  
433 *A. thaliana*; genes that showed differential isoform usage in response to stress in *S. parvula*; *S. parvula* genes  
434 that were enriched in non-canonical splice sites; and *S. parvula* genes that maintained or lowered their  
435 disorderdness by expression of specific isoforms under stress. These findings contribute to how we understand  
436 stress tolerance evolved in an extremophyte. Differential isoform usage offers a complementary path to  
437 increase the coding potential of the *S. parvula* genome that cannot be fully explained by gene duplication or  
438 promoter evolution alone. Future studies on other extremophytes exploring isoform diversity will facilitate the  
439 identification of convergent traits in isoform usage evolved in stress-adapted plants. Such a resource will be  
440 influential in deducing diverse stress responsive networks and identifying transferable stress responsive genes  
441 into crops.

442

#### 443 **Acknowledgements**

444 We thank Drs. Guannan Wang, Pramod Pantha, Dong-Ha Oh, Aaron Smith, John Larkin and graduate student  
445 Richard S Garcia for providing feedback on the manuscript and facilitating helpful discussions. This work was  
446 supported by the US National Science Foundation awards MCB-1616827 and IOS-EDGE-1923589, and US  
447 Department of Energy BER-DE-SC0020358 awarded to MD. CW and KT were additionally supported by an  
448 Economic Development Assistantship award from Louisiana State University. We acknowledge LSU High  
449 Performance Computing services for providing computational resources for this study.

450

#### 451 **Author Contributions**

452 CW and KT conducted wet lab experiments. CW performed bioinformatics analyses. MD developed the  
453 experimental design and supervised the overall project. CW, KT, and MD interpreted results and wrote the  
454 article.

455

#### 456 **References**

- 457 1. Berget, S. M., Moore, C., and Sharp, P. A. 1977, Spliced segments at the 5' terminus of adenovirus 2 late  
458 mRNA. *Proc. Natl. Acad. Sci. U. S. A.*, **74**, 3171–5.
- 459 2. Ule, J., and Blencowe, B. J. 2019, Alternative Splicing Regulatory Networks: Functions, Mechanisms, and  
460 Evolution. *Mol. Cell*, **76**, 329–45.

- 461 3. Schmucker, D., Clemens, J. C., Shu, H., et al. 2000, Drosophila Dscam Is an Axon Guidance Receptor  
462 Exhibiting Extraordinary Molecular Diversity modified by neuronal activity (reviewed by Albright et al.,  
463 2000). Extraordinary progress has been made in identifying. *Cell*, **101**, 671–84.
- 464 4. Celotto, A. M., and Graveley, B. R. 2001, Alternative splicing of the Drosophila Dscam pre-mRNA is both  
465 temporally and spatially regulated. *Genetics*, **159**, 599–608.
- 466 5. Pan, Q., Shai, O., Lee, L. J., Frey, B. J., and Blencowe, B. J. 2008, Deep surveying of alternative splicing  
467 complexity in the human transcriptome by high-throughput sequencing. *Nat. Genet.*, **40**, 1413–5.
- 468 6. Furlanis, E., Traunmüller, L., Fucile, G., and Scheiffele, P. 2019, Landscape of ribosome-engaged transcript  
469 isoforms reveals extensive neuronal-cell-class-specific alternative splicing programs. *Nat. Neurosci.*, **22**,  
470 1709–17.
- 471 7. Reixachs-Solé, M., Ruiz-Orera, J., Albà, M. M., and Eyra, E. 2020, Ribosome profiling at isoform level  
472 reveals evolutionary conserved impacts of differential splicing on the proteome. *Nat. Commun.*, **11**, 1768.
- 473 8. Morgan, J. T., Fink, G. R., and Bartel, D. P. 2019, Excised linear introns regulate growth in yeast. *Nature*,  
474 **565**, 606–11.
- 475 9. Gil, N., and Ulitsky, I. 2020, Regulation of gene expression by cis-acting long non-coding RNAs. *Nat. Rev.*  
476 *Genet.*, pp. 102–17.
- 477 10. Barbosa, C., Peixeiro, I., and Romão, L. 2013, Gene Expression Regulation by Upstream Open Reading  
478 Frames and Human Disease. *PLoS Genet.*, **9**, 1–12.
- 479 11. Calarco, J. A., Xing, Y., Cáceres, M., et al. 2007, Global analysis of alternative splicing differences between  
480 humans and chimpanzees. *Genes Dev.*, **21**, 2963–75.
- 481 12. Kalyna, M., Simpson, C. G., Syed, N. H., et al. 2012, Alternative splicing and nonsense-mediated decay  
482 modulate expression of important regulatory genes in Arabidopsis. *Nucleic Acids Res.*, **40**, 2454–69.
- 483 13. Yang, X., Zhang, H., and Li, L. 2012, Alternative mRNA processing increases the complexity of  
484 microRNA-based gene regulation in Arabidopsis. *Plant J.*, **70**, 421–31.
- 485 14. Chaudhary, S., Jabre, I., Reddy, A. S. N., Staiger, D., and Syed, N. H. 2019, Perspective on Alternative  
486 Splicing and Proteome Complexity in Plants. *Trends Plant Sci.*, **24**, 496–506.
- 487 15. Filichkin, S. A., Priest, H. D., Givan, S. A., et al. 2010, Genome-wide mapping of alternative splicing in  
488 Arabidopsis thaliana. *Genome Res.*, **20**, 45–58.
- 489 16. Zhang, R., Calixto, C. P. G., Marquez, Y., et al. 2017, A high quality Arabidopsis transcriptome for accurate  
490 transcript-level analysis of alternative splicing. *Nucleic Acids Res.*, **45**, 5061–73.
- 491 17. Wang, B., Tseng, E., Regulski, M., et al. 2016, Unveiling the complexity of the maize transcriptome by  
492 single-molecule long-read sequencing. *Nat. Commun.*, **7**.
- 493 18. Wang, B., Regulski, M., Tseng, E., et al. 2018, A comparative transcriptional landscape of maize and  
494 sorghum obtained by single-molecule sequencing. *Genome Res.*, **28**, 921–32.
- 495 19. Wang, M., Wang, P., Liang, F., et al. 2018, A global survey of alternative splicing in allopolyploid cotton:  
496 landscape, complexity and regulation. *New Phytol.*, **217**, 163–78.
- 497 20. Smith, C. C. R., Tittes, S., Paul Mendieta, J., et al. 2018, Genetics of alternative splicing evolution during

- 498 sunflower domestication. *Proc. Natl. Acad. Sci. U. S. A.*, **115**, 6768–73.
- 499 21. Ding, F., Cui, P., Wang, Z., Zhang, S., Ali, S., and Xiong, L. 2014, Genome-wide analysis of alternative  
500 splicing of pre-mRNA under salt stress in Arabidopsis. *BMC Genomics*, **15**, 1–14.
- 501 22. Calixto, C. P. G., Guo, W., James, A. B., et al. 2018, Rapid and dynamic alternative splicing impacts the  
502 arabidopsis cold response transcriptome[CC-BY]. *Plant Cell*, **30**, 1424–44.
- 503 23. Chen, M. X., Zhu, F. Y., Wang, F. Z., et al. 2019, Alternative splicing and translation play important roles in  
504 hypoxic germination in rice. *J. Exp. Bot.*, **70**, 885–95.
- 505 24. Kannan, S., Halter, G., Renner, T., and Waters, E. R. 2018, Patterns of alternative splicing vary between  
506 species during heat stress. *AoB Plants*, **10**, 1–11.
- 507 25. Liu, J., Sun, N., Liu, M., et al. 2013, An autoregulatory loop controlling Arabidopsis HsfA2 expression:  
508 Role of heat shock-induced alternative splicing. *Plant Physiol.*, **162**, 512–21.
- 509 26. Kazachkova, Y., Eshel, G., Pantha, P., Cheeseman, J. M., Dassanayake, M., and Barak, S. 2018,  
510 Halophytism: What have we learnt from arabidopsis thaliana relative model systems? *Plant Physiol.*, **178**,  
511 972–88.
- 512 27. Oh, D.-H., Dassanayake, M., Bohnert, H. J., and Cheeseman, J. M. 2012, Life at the extreme: lessons from  
513 the genome. *Genome Biol. 2012 133*, **13**, 127–30.
- 514 28. Zhu, J.-K., Jessica Whited, Andrei Seluanov, et al. 2015, The Next Top Models. *Cell*, **163**, 18–20.
- 515 29. Dassanayake, M., Oh, D.-H., Haas, J. S., et al. 2011, The genome of the extremophile crucifer *Thellungiella*  
516 *parvula*. *Nat. Genet.*, **43**, 913–8.
- 517 30. Oh, D. H., and Dassanayake, M. 2019, Landscape of gene transposition-duplication within the Brassicaceae  
518 family. *DNA Res.*, **26**, 21–36.
- 519 31. Gul Nilhan, T., Ahmet Emre, Y., and Osman, K. 2008, Soil Determinants for Distribution of *Halocnemum*  
520 *strobilaceum* Bieb. (Chenopodiaceae) Around Lake Tuz, Turkey. *Pakistan J. Biol. Sci.*, **11**, 565–70.
- 521 32. Oh, D. H., Hong, H., Lee, S. Y., Yun, D. J., Bohnert, H. J., and Dassanayake, M. 2014, Genome structures  
522 and transcriptomes signify niche adaptation for the multiple-ion-tolerant extremophyte *Schrenkiella parvula*.  
523 *Plant Physiol.*, **164**, 2123–38.
- 524 33. Wang, G., DiTusa, S. F., Oh, D., et al. 2021, Cross species multi-omics reveals cell wall sequestration and  
525 elevated global transcript abundance as mechanisms of boron tolerance in plants. *New Phytol.*, **230**, 1985–  
526 2000.
- 527 34. Iñiguez, L. P., and Hernández, G. 2017, The evolutionary relationship between alternative splicing and gene  
528 duplication. *Front. Genet.*, **8**, 1–7.
- 529 35. Tran, K.-N., Wang, G., Oh, D.-H., Larkin, J. C., Smith, A. P., and Dassanayake, M. 2021, Multiple paths  
530 lead to salt tolerance - pre-adaptation vs dynamic responses from two closely related extremophytes.  
531 *bioRxiv*, 2021.10.23.465591.
- 532 36. Wu, T. D., and Watanabe, C. K. 2005, GMAP: A genomic mapping and alignment program for mRNA and  
533 EST sequences. *Bioinformatics*, **21**, 1859–75.
- 534 37. Tardaguila, M., De La Fuente, L., Marti, C., et al. 2018, SQANTI: Extensive characterization of long-read

- 535 transcript sequences for quality control in full-length transcriptome identification and quantification.  
536 *Genome Res.*, **28**, 396–411.
- 537 38. Mi, H., Muruganujan, A., and Thomas, P. D. 2013, PANTHER in 2013: Modeling the evolution of gene  
538 function, and other gene attributes, in the context of phylogenetic trees. *Nucleic Acids Res.*, **41**, 377–86.
- 539 39. Maere, S., Heymans, K., and Kuiper, M. 2005, BiNGO: A Cytoscape plugin to assess overrepresentation of  
540 Gene Ontology categories in Biological Networks. *Bioinformatics*, **21**, 3448–9.
- 541 40. Wang, G., Oh, D. H., and Dassanayake, M. 2020, GOMCL: A toolkit to cluster, evaluate, and extract non-  
542 redundant associations of Gene Ontology-based functions. *BMC Bioinformatics*, **21**, 1–9.
- 543 41. Zhang, R., Calixto, C. P. G., Marquez, Y., et al. 2017, A high quality Arabidopsis transcriptome for accurate  
544 transcript-level analysis of alternative splicing. *Nucleic Acids Res.*, **45**, 5061–73.
- 545 42. Patro, R., Duggal, G., Love, M. I., Irizarry, R. A., Kingsford, C., and Biology, C. 2017, Salmon, **14**, 417–9.
- 546 43. Oh, D. H., and Dassanayake, M. 2019, Landscape of gene transposition-duplication within the Brassicaceae  
547 family. *DNA Res.*, **26**, 21–36.
- 548 44. Love, M. I., Huber, W., and Anders, S. 2014, Moderated estimation of fold change and dispersion for RNA-  
549 seq data with DESeq2. *Genome Biol.*, **15**, 1–21.
- 550 45. Trincado, J. L., Entizne, J. C., Hysenaj, G., et al. 2018, SUPPA2: Fast, accurate, and uncertainty-aware  
551 differential splicing analysis across multiple conditions. *Genome Biol.*, **19**, 1–11.
- 552 46. Ritchie, W., Granjeaud, S., Puthier, D., and Gautheret, D. 2008, Entropy measures quantify global splicing  
553 disorders in cancer. *PLoS Comput. Biol.*, **4**, 1–9.
- 554 47. Kumar, U., Kumar, V., and Kapur, J. N. 1986, Normalized measures of entropy. *Int. J. Gen. Syst.*, **12**, 55–  
555 69.
- 556 48. Jaganathan, K., Kyriazopoulou Panagiotopoulou, S., McRae, J. F., et al. 2019, Predicting Splicing from  
557 Primary Sequence with Deep Learning. *Cell*, **176**, 535-548.e24.
- 558 49. Cheng, C. Y., Krishnakumar, V., Chan, A. P., Thibaud-Nissen, F., Schobel, S., and Town, C. D. 2017,  
559 Araport11: a complete reannotation of the Arabidopsis thaliana reference genome. *Plant J.*, **89**, 789–804.
- 560 50. Helvacı, C., Mordogan, H., Çolak, M., and Gündogan, I. 2004, Presence and distribution of lithium in borate  
561 deposits and some recent lake waters of west-central turkey. *Int. Geol. Rev.*, **46**, 177–90.
- 562 51. Pleiss, J. A., Whitworth, G. B., Bergkessel, M., and Guthrie, C. 2007, Rapid, Transcript-Specific Changes in  
563 Splicing in Response to Environmental Stress. *Mol. Cell*, **27**, 928–37.
- 564 52. Shi, H., Ishitani, M., Kim, C., and Zhu, J. K. 2000, The Arabidopsis thaliana salt tolerance gene SOS1  
565 encodes a putative Na<sup>+</sup>/H<sup>+</sup> antiporter. *Proc. Natl. Acad. Sci. U. S. A.*, **97**, 6896–901.
- 566 53. Székely, G., Ábrahám, E., Cséplő, Á., et al. 2008, Duplicated P5CS genes of Arabidopsis play distinct roles  
567 in stress regulation and developmental control of proline biosynthesis. *Plant J.*, **53**, 11–28.
- 568 54. Martínez, O., and Reyes-Valdés, M. H. 2008, Defining diversity, specialization, and gene specificity in  
569 transcriptomes through information theory. *Proc. Natl. Acad. Sci. U. S. A.*, **105**, 9709–14.
- 570 55. Bou Sleiman, M., Frochoux, M. V., Andreani, T., Osman, D., Guigo, R., and Deplancke, B. 2020, Enteric  
571 infection induces Lark-mediated intron retention at the 5' end of Drosophila genes. *Genome Biol.*, **21**, 1–19.



- 572 56. Pucker, B., and Brockington, S. F. 2018, Genome-wide analyses supported by RNA-Seq reveal non-  
573 canonical splice sites in plant genomes. *BMC Genomics*, **19**, 1–13.
- 574 57. Zhu, F. Y., Chen, M. X., Ye, N. H., et al. 2017, Proteogenomic analysis reveals alternative splicing and  
575 translation as part of the abscisic acid response in Arabidopsis seedlings. *Plant J.*, **91**, 518–33.
- 576 58. Li, J., Li, X., Guo, L., et al. 2006, A subgroup of MYB transcription factor genes undergoes highly  
577 conserved alternative splicing in Arabidopsis and rice. *J. Exp. Bot.*, **57**, 1263–73.
- 578 59. Laloum, T., Martín, G., and Duque, P. 2018, Alternative Splicing Control of Abiotic Stress Responses.  
579 *Trends Plant Sci.*, **23**, 140–50.
- 580 60. Feng, J., Li, J., Gao, Z., et al. 2015, SKIP Confers Osmotic Tolerance during Salt Stress by Controlling  
581 Alternative Gene Splicing in Arabidopsis. *Mol. Plant*, **8**, 1038–52.
- 582 61. Liu, H., Dai, J., Li, K., et al. 2022, Performance evaluation of computational methods for splice-disrupting  
583 variants and improving the performance using the machine learning-based framework. *Brief. Bioinform.*, **23**,  
584 bbac334.
- 585 62. Eraslan, G., Avsec, Ž., Gagneur, J., and Theis, F. J. 2019, Deep learning: new computational modelling  
586 techniques for genomics. *Nat. Rev. Genet.*, **20**, 389–403.
- 587 63. Wu, H. J., Zhang, Z., Wang, J. Y., et al. 2012, Insights into salt tolerance from the genome of *Thellungiella*  
588 *salsuginea*. *Proc. Natl. Acad. Sci.*, **109**, 12219–24.
- 589 64. Liu, C., Wu, Y., Liu, Y., et al. 2021, Genome-wide analysis of tandem duplicated genes and their  
590 contribution to stress resistance in pigeonpea (*Cajanus cajan*). *Genomics*, **113**, 728–35.
- 591 65. Chaudhary, S., Khokhar, W., Jabre, I., et al. 2019, Alternative splicing and protein diversity: Plants versus  
592 animals. *Front. Plant Sci.*, **10**, 1–14.
- 593 66. Brown, J. W. S., Calixto, C. P. G., and Zhang, R. 2017, High-quality reference transcript datasets hold the  
594 key to transcript-specific RNA-seq analysis in plants. *New Phytol.*, **213**, 525–30.
- 595 67. Huang, C. K., Lin, W. D., and Wu, S. H. 2022, An improved repertoire of splicing variants and their  
596 potential roles in Arabidopsis photomorphogenic development. *Genome Biol.*, **23**, 1–28.
- 597 68. Oh, D. H., Hong, H., Lee, S. Y., Yun, D. J., Bohnert, H. J., and Dassanayake, M. 2014, Genome structures  
598 and transcriptomes signify niche adaptation for the multiple-ion-tolerant extremophyte *Schrenkiella parvula*.  
599 *Plant Physiol.*, **164**, 2123–38.
- 600 69. Martín, G., Márquez, Y., Mantica, F., Duque, P., and Irimia, M. 2021, Alternative splicing landscapes in  
601 Arabidopsis thaliana across tissues and stress conditions highlight major functional differences with animals.  
602 *Genome Biol.*, **22**, 1–26.
- 603 70. Filichkin, S., Priest, H. D., Megraw, M., and Mockler, T. C. 2015, Alternative splicing in plants: Directing  
604 traffic at the crossroads of adaptation and environmental stress. *Curr. Opin. Plant Biol.*, **24**, 125–35.
- 605 71. Mastrangelo, A. M., Marone, D., Laidò, G., De Leonardis, A. M., and De Vita, P. 2012, Alternative  
606 splicing: Enhancing ability to cope with stress via transcriptome plasticity. *Plant Sci.*, **185–186**, 40–9.
- 607 72. Drechsel, G., Kahles, A., Kesarwani, A. K., et al. 2013, Nonsense-mediated decay of alternative precursor  
608 mRNA splicing variants is a major determinant of the Arabidopsis steady state transcriptome. *Plant Cell*, **25**,

- 609 3726–42.
- 610 73. Sterne-Weiler, T., Weatheritt, R. J., Best, A. J., Ha, K. C. H., and Blencowe, B. J. 2018, Efficient and  
611 Accurate Quantitative Profiling of Alternative Splicing Patterns of Any Complexity on a Laptop. *Mol. Cell*,  
612 **72**, 187-200.e6.
- 613 74. Dankó, B., Szikora, P., Pór, T., Szeifert, A., and Sebestyén, E. 2022, SplicingFactory - Splicing diversity  
614 analysis for transcriptome data. *Bioinformatics*, **38**, 384–90.

615  
616  
617  
618

## 619 **Tables**

620 **Table 1.** Summary of *S. parvula* V2 genome updated with transcript models supported by Iso-Seq

| Category                                                           | Number of genes or transcripts |
|--------------------------------------------------------------------|--------------------------------|
| Genes supported by an Iso-Seq based transcript model               | 11,348                         |
| Total transcript models identified from Iso-Seq                    | 16,828                         |
| Gene models identified with at least one new isoform               | 7,028                          |
| New genes identified from Iso-Seq                                  | 301                            |
| Gene models supplemented with UTR information using Iso-Seq        | 11,348                         |
| Genes with alternative splicing identified using Iso-Seq           | 3,470                          |
| Genes with alternative starts identified using Iso-Seq             | 4,760                          |
| Genes with alternative ends identified using Iso-Seq               | 4,756                          |
| Total number of protein coding transcripts annotated in the genome | 34,582                         |

621

622 **Table 2. Major alternative splicing events identified using Iso-Seq reads in *S. parvula*.** Blue boxes  
623 represent exons while red boxes or dash lines represent introns.

| Event type                                                                          | # of events (%)      |
|-------------------------------------------------------------------------------------|----------------------|
| <b>Reference gene model</b>                                                         |                      |
|    | <b>5,911 (100%)</b>  |
|    |                      |
| <b>Intron retention</b>                                                             | <b>3,266 (55.2%)</b> |
|    |                      |
| <b>Alternative 3' acceptor</b>                                                      | <b>1,451 (24.5%)</b> |
|    |                      |
| <b>Alternative 5' donor</b>                                                         | <b>693 (11.7%)</b>   |
|    |                      |
| <b>Exon skipping</b>                                                                | <b>283 (4.7%)</b>    |
|    |                      |
| <b>Alternative first exon</b>                                                       | <b>189 (3.19%)</b>   |
|    |                      |
| <b>Alternative last exon</b>                                                        | <b>18 (0.30%)</b>    |
|    |                      |
| <b>Mutually exclusive exons</b>                                                     |                      |
|  | <b>11 (0.18%)</b>    |
| or                                                                                  |                      |
|  |                      |

624

625

### 626 Figure legends

627 **Figure 1. Improved *S. parvula* gene models using full length transcripts.** [A] Majority of error corrected  
628 circular consensus reads (CCS) contain full length reads with polyA sequences and an average length of 1.7  
629 kb. [B] Length distribution of Iso-Seq based transcript models and *S. parvula* Reference genome v2.2 gene  
630 models. [C] Percentage of mapped reads to the current genome and genome updated with Iso-Seq transcript  
631 models. Data = mean  $\pm$  SD. Dots represent 4 independent RNA-Seq datasets used in this study as biological  
632 replicates (n = 12). Asterisk indicates significant difference ( $p \leq 0.05$ ), determined by one-sided t-test.

633

634 **Figure 2. Genes with higher isoform diversity are associated with stress responses in *S. parvula***  
635 **compared to *A. thaliana*.** [A] Number of isoforms of *S. parvula* and *A. thaliana* per single-copy ortholog  
636 pairs given as a ratio. Blue and pink shaded areas indicate ortholog pairs where one species has more isoforms  
637 than the other. [B] Enriched functions associated with ortholog pairs that show at least 2-fold difference in  
638 isoform ratio between *S. parvula* and *A. thaliana*. Center line in the boxplots indicates median; box indicates

639 interquartile range (IQR); whiskers show  $1.5 \times \text{IQR}$ . Asterisks indicate significant difference between isoform  
640 distributions of the two species, measured by Wilcoxon rank sum test at  $p$ -value cutoff  $\leq 0.05$ .

641

642 **Figure 3. Isoform usage specificity between control and salt treated conditions.** [A] Shannon entropy  
643 distribution of 1,678 ortholog pairs with at least two isoforms expressed per ortholog per species. Center line  
644 in the boxplots indicates median; box indicates interquartile range (IQR); whiskers show  $1.5 \times \text{IQR}$ . Each  
645 treatment was compared to control according to Student's  $t$  test with  $p$ -values indicated above the relevant  
646 pairs. [B] Shannon entropy change between salt and control conditions in *S. parvula* and *A. thaliana* ortholog  
647 pairs in roots. Each dot represents an ortholog pair. Black lines indicate 0.5 entropy differences. Frequency  
648 distribution of data are shown on the marginal plot. [C] Functionally enriched processes represented by  
649 ortholog pairs in distinct categories of entropy shifts. A node in each cluster represents a gene ontology (GO)  
650 term; size of a node represents the number of genes included in that GO term; the clusters that represent similar  
651 functions share the same color and are given a representative cluster name and ID; and the edges between  
652 nodes show shared genes between functions. All clusters included in the network have adj  $p$ -values  $\leq 0.05$  with  
653 false discovery rate correction applied.

654

655 **Figure 4. Genes differently spliced and differently expressed in response to salt stress.** [A] Number of  
656 genes in *S. parvula* and *A. thaliana* that are differently regulated under salt stress. [B] Number of orthologs  
657 that show differential splicing in *S. parvula* and *A. thaliana* root and shoot in response to salt. [C] Functionally  
658 enriched processes represented by differently spliced genes in *S. parvula* and *A. thaliana*.

659

660 **Figure 5. Use of non-canonical splice sites in transcripts expressed under stress.** [A] Expression  
661 distribution of transcripts that contain only canonical splice sites and transcripts with at least one non-canonical  
662 splice site in roots and shoots of *S. parvula* (left panel) and *A. thaliana* (right panel). Asterisks indicate  
663 significant difference ( $p \leq 0.05$ ) of expression distributions between control and salt treated condition  
664 measured by two-sided  $t$ -test. [B] Number of expressed non-canonically spliced transcripts as a % out of total  
665 transcripts expressed in *S. parvula* and *A. thaliana* in response to salt. Significant differences between control  
666 and stress conditions were tested using Fisher's exact test. [C] *S. parvula* genes that were enriched in non-  
667 canonical splice sites. The y axis shows the  $-\log_{10} p$ -value for a test of excess of non-canonical splice sites  
668 computed using a binomial test, where the probability of enrichment is calculated as the total non-canonical  
669 splice sites divided by the total number of splice sites per gene, ordered in the chromosomal order (x-axis) for  
670 the *S. parvula* genome. Genes with a high enrichment for non-canonical splicing are labeled. Red line indicates  
671 the  $-\log_{10} p$  corresponding to adjusted  $p$ -value of 0.05. [D] Functional processes enriched in genes detected to  
672 be non-canonically spliced in [C]. A node in each cluster represents a gene ontology (GO) term; size of a node  
673 represents the number of genes included in that GO term; the clusters that represent similar functions share the

674 same color and are given a representative cluster name and ID; and the edges between nodes show the  
675 connectivity of genes between functions. All clusters included in the network have adj  $p$ -values  $\leq 0.05$  with  
676 false discovery rate correction applied. More significant values are represented by darker node colors. The  
677 right panel shows the sub-clustered functions represented by the largest cluster C1 in the left panel.  
678

679 **Figure 6. Genome wide prediction of splice sites for *S. parvula* using a deep neural network.** [A] Training  
680 and testing with *A. thaliana* and application of the SpliceAi model to *S. parvula*. [B] Overlap between the  
681 observed and predicted splice sites for *S. parvula* protein coding gene models. A probability score  $\geq 0.6$  was  
682 used for the predicted splice sites. [C] Functional processes enriched in genes observed and predicted to have  
683 more than one isoform in the *S. parvula* genome. A node in each cluster represents a gene ontology (GO) term;  
684 size of a node represents the number of genes included in that GO term; the clusters that represent similar  
685 functions share the same color and are given a representative cluster name; and the edges between nodes show  
686 the connectivity of genes between functions. All clusters included in the network have adj  $p$ -values  $\leq 0.05$  with  
687 false discovery rate correction applied.  
688

689 **Figure S1. UTR length distribution of transcript models in *S. parvula* and *A. thaliana*.** [A] 5' UTR and  
690 [B] 3' UTR length distributions. The distributions were obtained from 16,828 *S. parvula* and 41,064 *A.*  
691 *thaliana* transcript models  
692

693 **Figure S2. Novel gene *SP4G29525* (*SpMHX1*) annotated using Iso-Seq transcript models.** Two transcript  
694 models were detected with Iso-Seq full length reads for both *MHX* and *PHR2* gene models.  
695

696 **Figure S3. Independent detection of selected isoforms first identified with Iso-Seq in *S. parvula***  
697 **transcriptome.** [A] Transcript models of selected genes with isoform IDs. Coding region and UTR regions are  
698 indicated in dark and light shades. Locations of primer binding sites are shown by arrows. Exons are  
699 numbered. Introns are given as connecting lines between exons. Identical exon structures past the 2<sup>nd</sup> exon  
700 between isoforms are represented by dashed lines. [B] Predicted protein coding regions and functional domains  
701 of the corresponding transcripts. Functional domains for each transcript are marked as colored blocks. [C] Gel  
702 electrophoresis images of amplified transcripts obtained from RT-PCR using primers indicated in A. Arrow  
703 heads indicate the expected size of the amplified product.  
704

705 **Figure S4. *SOS1* and *P5CSI* isoform diversity in *S. parvula*.** [A] *SpSOS1* isoforms expressed above 0.5  
706 TPM in all conditions. *SpSOS1* (*v2*) serves as the primary gene model annotated in the current genome  
707 annotation. [B] *SpP5CSI* isoforms expressed above 0.5 TPM in all conditions. *SpP5CSI* (*v2*) serves as the  
708 primary gene model annotated in the current genome annotation. Data = mean  $\pm$  SD ( $n = 3$ ).  
709

710 **Figure S5. Differential regulation of orthologs in *S. parvula* and *A. thaliana* in response to salt stress. [A]**

711 Root and [B] shoot. UpSet plot numbers represent number of orthologs. DS - Differently spliced; DE –

712 Differently expressed; Sp - *S. parvula*; At - *A. thaliana*.

713

714 **Figure S6. Probability of splice sites identified using SpliceAi from 5' to 3' for *S. parvula* gene models.**

715 Dashed line indicates the probability thresholds used to predict a splice site.

716

717

718 **Supplementary Table 1.** Primers used for RT-PCR.

719

720 **Supplementary Table 2.** Ortholog pairs between *S. parvula* and *A. thaliana* isoforms, annotations, and  
721 isoform ratio.

722

723 **Supplementary Table 3.** Differently spliced and differently expressed genes in *S. parvula* and *A. thaliana*.

724

725 **Supplementary Table 4.** Enrichment for non-canonical over canonical splice in *S. parvula*.

726

727 **Supplementary Table 5.** Predicted and observed splice sites in the *S. parvula* genome. Link:

728 [https://github.com/wchathura/Iso-Seq\\_Dataset/blob/main/Supplemtry\\_table\\_5.txt](https://github.com/wchathura/Iso-Seq_Dataset/blob/main/Supplemtry_table_5.txt)

729

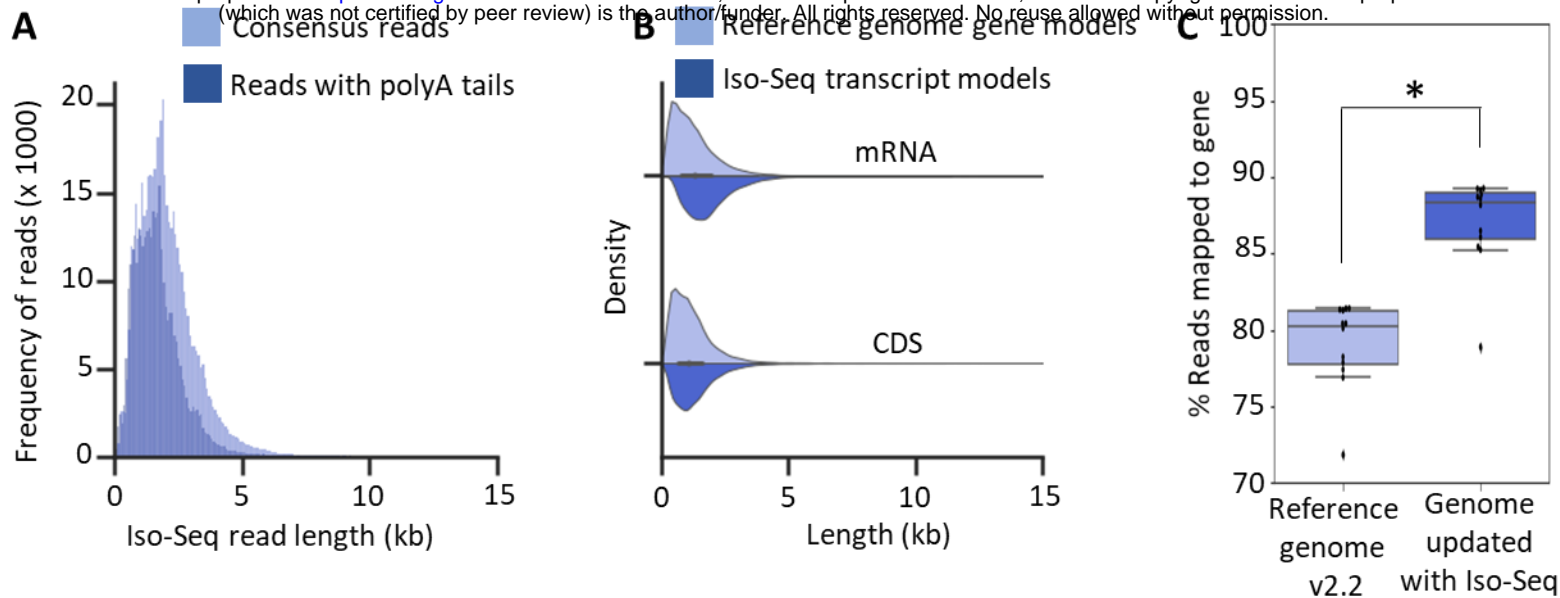

**Figure 1. Improved *S. parvula* gene models using full length transcripts.** [A] Majority of error corrected circular consensus reads (CCS) contain full length reads with polyA sequences and an average length of 1.7 kb. [B] Length distribution of Iso-Seq based transcript models and *S. parvula* Reference genome v2.2 gene models. [C] Percentage of mapped reads to the current genome and genome updated with Iso-Seq transcript models. Data = mean  $\pm$  SD. Dots represent 4 independent RNA-Seq datasets used in this study as biological replicates ( $n = 12$ ). Asterisk indicates significant difference ( $p \leq 0.05$ ), determined by one-sided t-test.

**Table 1.** Summary of *S. parvula* V2 genome updated with transcript models supported by Iso-Seq.

| Category                                                           | Number of genes or transcripts |
|--------------------------------------------------------------------|--------------------------------|
| Genes supported by an Iso-Seq based transcript model               | 11,348                         |
| Total transcript models identified from Iso-Seq                    | 16,828                         |
| Gene models identified with at least one new isoform               | 7,028                          |
| New genes identified from Iso-Seq                                  | 301                            |
| Gene models supplemented with UTR information using Iso-Seq        | 11,348                         |
| Genes with alternative splicing identified using Iso-Seq           | 3,470                          |
| Genes with alternative starts identified using Iso-Seq             | 4,760                          |
| Genes with alternative ends identified using Iso-Seq               | 4,756                          |
| Total number of protein coding transcripts annotated in the genome | 34,582                         |



**Table 2. Major alternative splicing events identified using Iso-Seq reads in *S. parvula*.** Blue boxes represent exons while red boxes or dash lines represent introns.

| Event type                                                                         | # of events (%) |
|------------------------------------------------------------------------------------|-----------------|
| Reference gene model                                                               |                 |
| 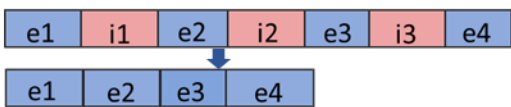  | 5,911 (100%)    |
| Intron retention                                                                   | 3,266 (55.2%)   |
|   |                 |
| Alternative 3' acceptor                                                            | 1,451 (24.5%)   |
|   |                 |
| Alternative 5' donor                                                               | 693 (11.7%)     |
|   |                 |
| Exon skipping                                                                      | 283 (4.7%)      |
|   |                 |
| Alternative first exon                                                             | 189 (3.19%)     |
|   |                 |
| Alternative last exon                                                              | 18 (0.30%)      |
|   |                 |
| Mutually exclusive exons                                                           | 11 (0.18%)      |
|  |                 |

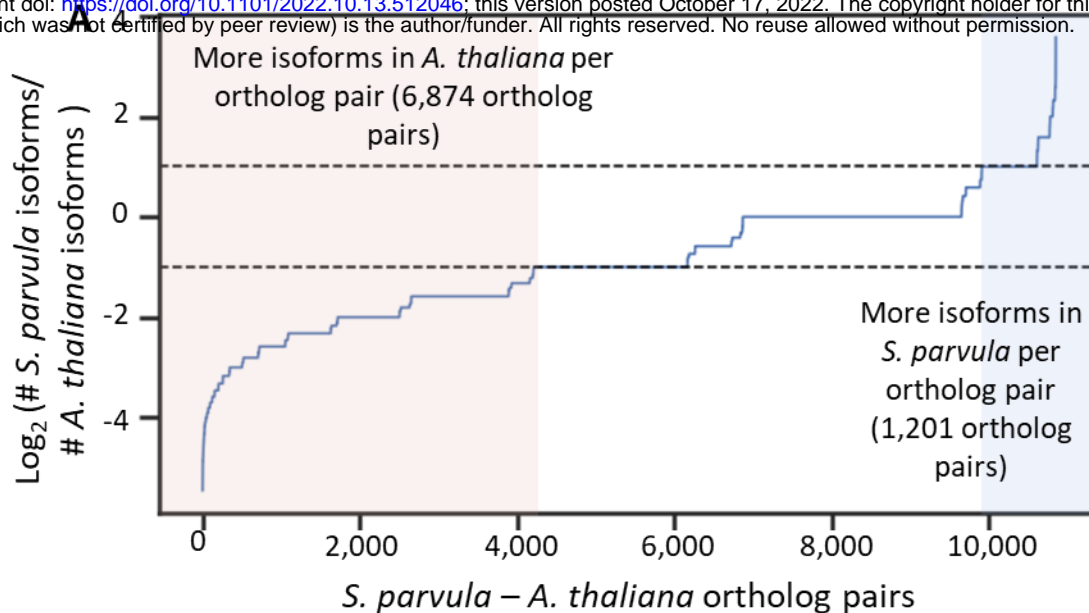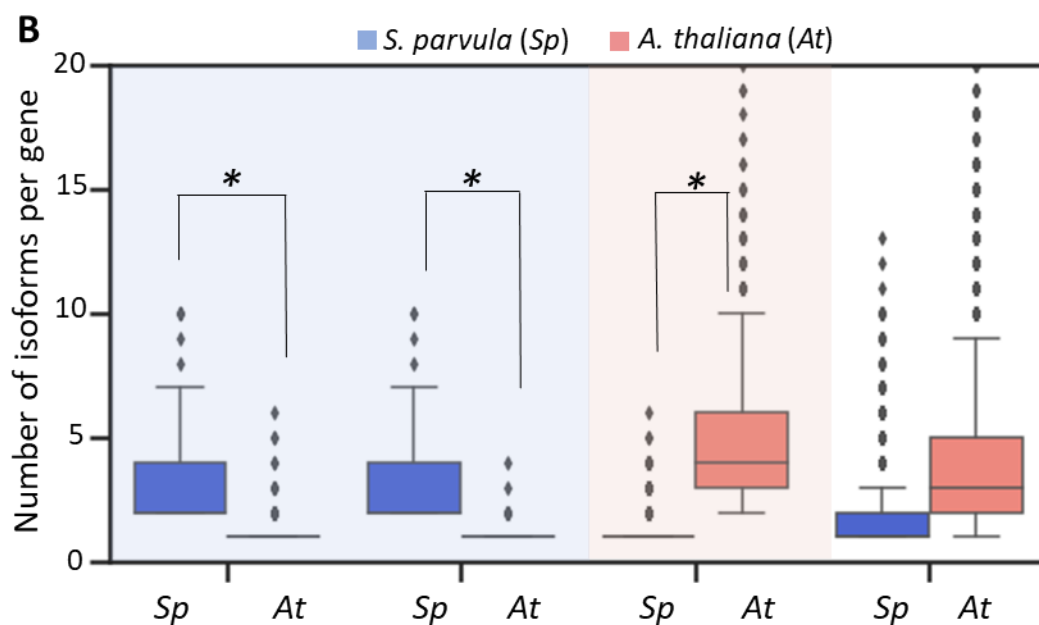

| GO category      | Response to stress |     | Transport |     | Nitrogen metabolism |       | All ortholog pairs |        |
|------------------|--------------------|-----|-----------|-----|---------------------|-------|--------------------|--------|
| # Ortholog pairs | 144                |     | 102       |     | 855                 |       | 9,430              |        |
| # Isoforms       | 486                | 193 | 315       | 117 | 1,126               | 4,422 | 15,048             | 34,614 |

**Figure 2. Genes with higher isoform diversity are associated with stress responses in *S. parvula* compared to *A. thaliana*.** [A] Number of isoforms of *S. parvula* and *A. thaliana* per single-copy ortholog pairs given as a ratio. Blue and pink shaded areas indicate ortholog pairs where one species has more isoforms than the other. [B] Enriched functions associated with ortholog pairs that show at least 2-fold difference in isoform ratio between *S. parvula* and *A. thaliana*. Center line in the boxplots indicates median; box indicates interquartile range (IQR); whiskers show  $1.5 \times \text{IQR}$ . Asterisks indicate significant difference between isoform distributions of the two species, measured by Wilcoxon rank sum test at  $p$ -value cutoff  $\leq 0.05$ .

**A**

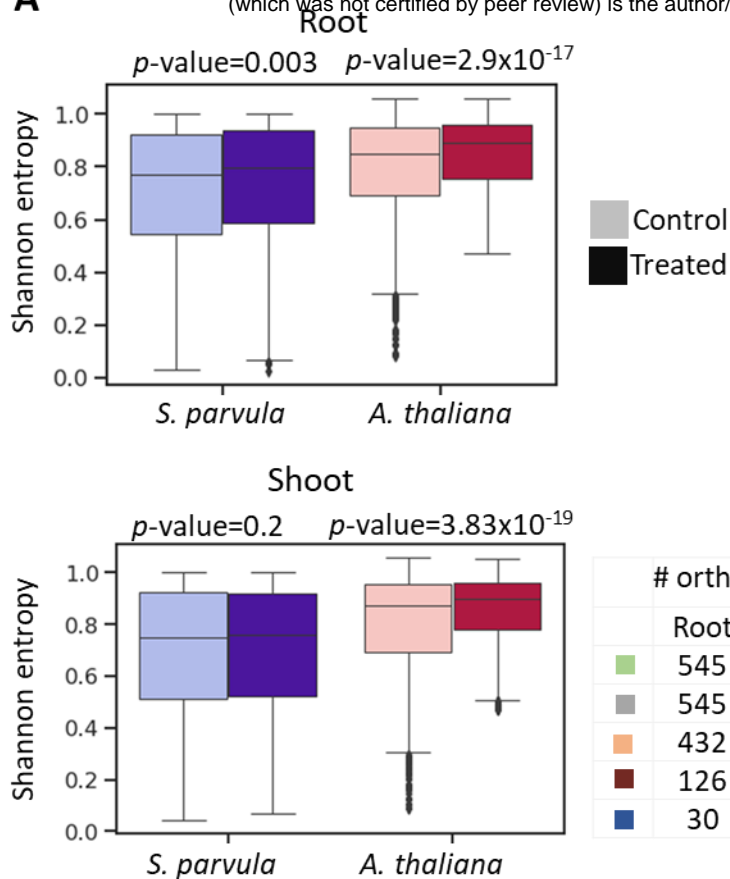

**B**

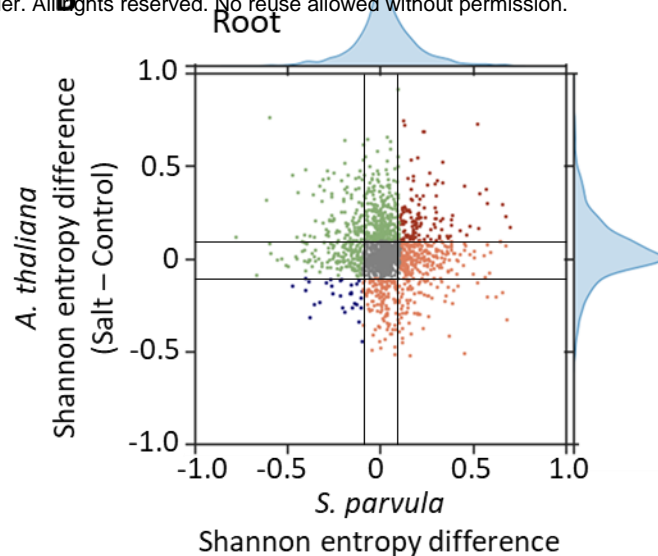

| # ortholog pairs |      |       |                                                              |
|------------------|------|-------|--------------------------------------------------------------|
|                  | Root | Shoot |                                                              |
| ■                | 545  | 362   | Entropy is maintained lower or constant in <i>S. parvula</i> |
| ■                | 545  | 513   | Entropy remained constant in both species                    |
| ■                | 432  | 575   | Entropy maintained lower or constant in <i>A. thaliana</i>   |
| ■                | 126  | 93    | Entropy higher in both species                               |
| ■                | 30   | 49    | Entropy lower in both species                                |

**C** Root

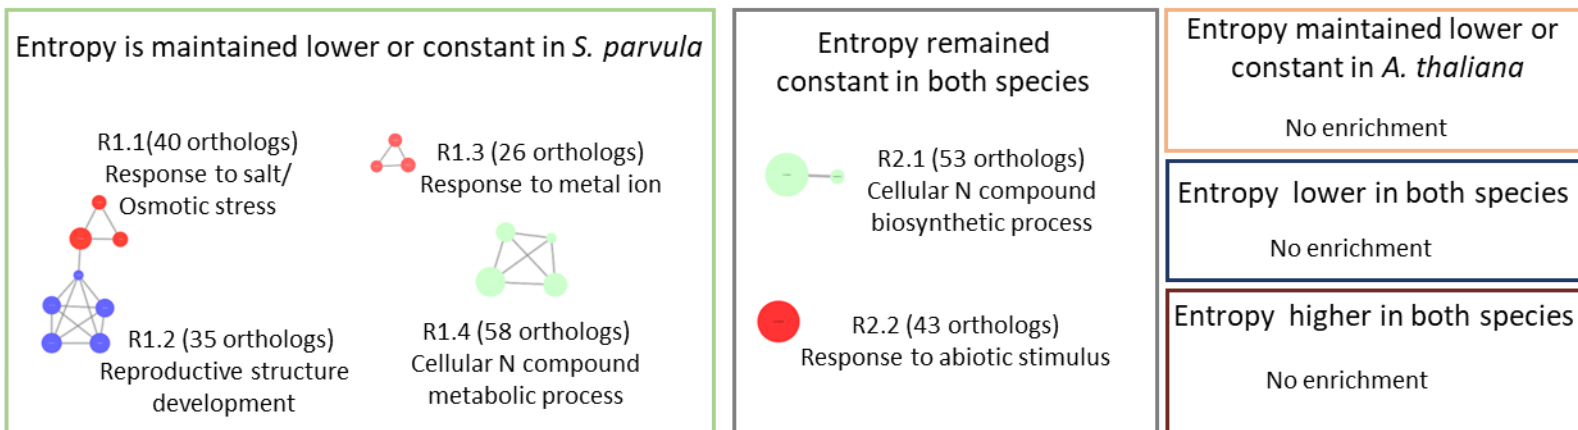

Shoot

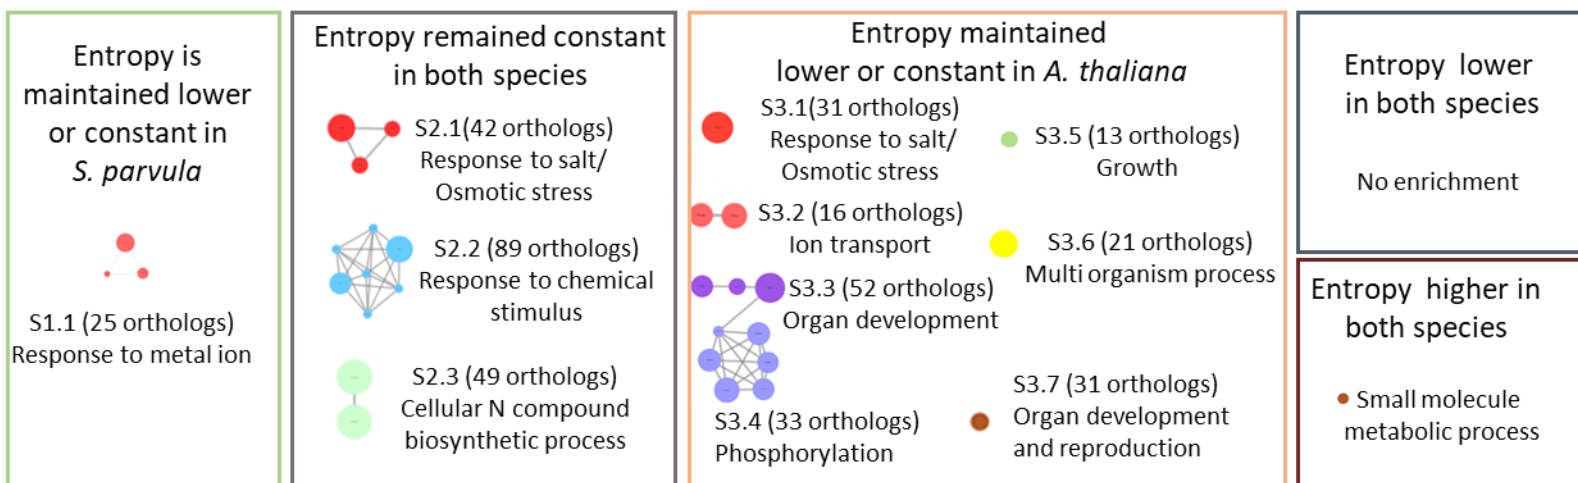

**Figure 3. Isoform usage specificity between control and salt treated conditions.** **[A]** Shannon entropy distribution of 1,678 ortholog pairs with at least two isoforms expressed per ortholog per species. Center line in the boxplots indicates median; box indicates interquartile range (IQR); whiskers show  $1.5 \times$  IQR. Each treatment was compared to control according to Student's t test with p-values indicated above the relevant pairs. **[B]** Shannon entropy change between salt and control conditions in *S. parvula* and *A. thaliana* ortholog pairs in roots. Each dot represents an ortholog pair. Black lines indicate 0.5 entropy differences. Frequency distribution of data are shown on the marginal plot. **[C]** Functionally enriched processes represented by ortholog pairs in distinct categories of entropy shifts. A node in each cluster represents a gene ontology (GO) term; size of a node represents the number of genes included in that GO term; the clusters that represent similar functions share the same color and are given a representative cluster name and ID; and the edges between nodes show shared genes between functions. All clusters included in the network have adj p-values  $\leq 0.05$  with false discovery rate correction applied.

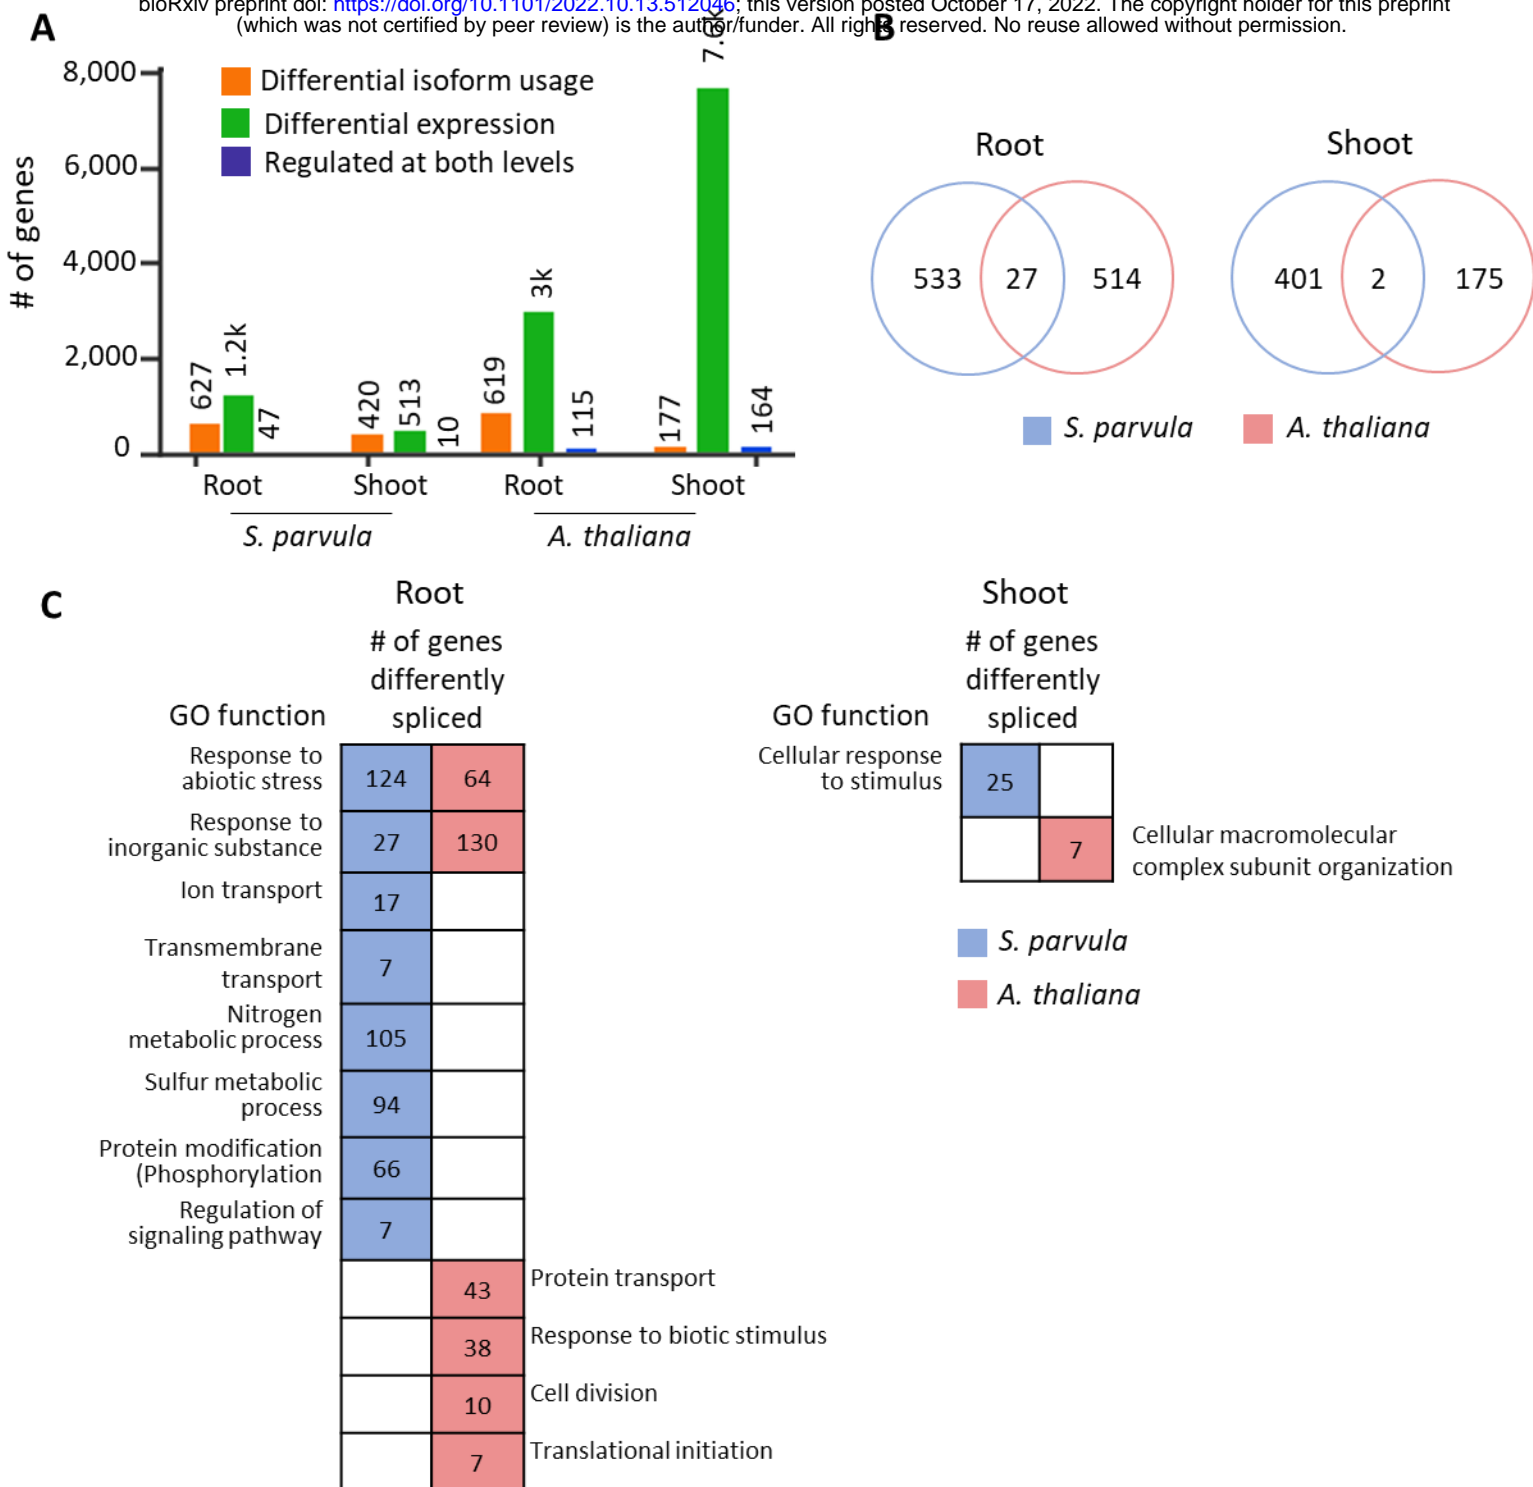

**Figure 4. Genes differently spliced and differently expressed in response to salt stress. [A]** Number of genes in *S. parvula* and *A. thaliana* that are differentially regulated under salt stress. **[B]** Number of orthologs that show differential splicing in *S. parvula* and *A. thaliana* root and shoot in response to salt. **[C]** Functionally enriched processes represented by differentially spliced genes in *S. parvula* and *A. thaliana*.

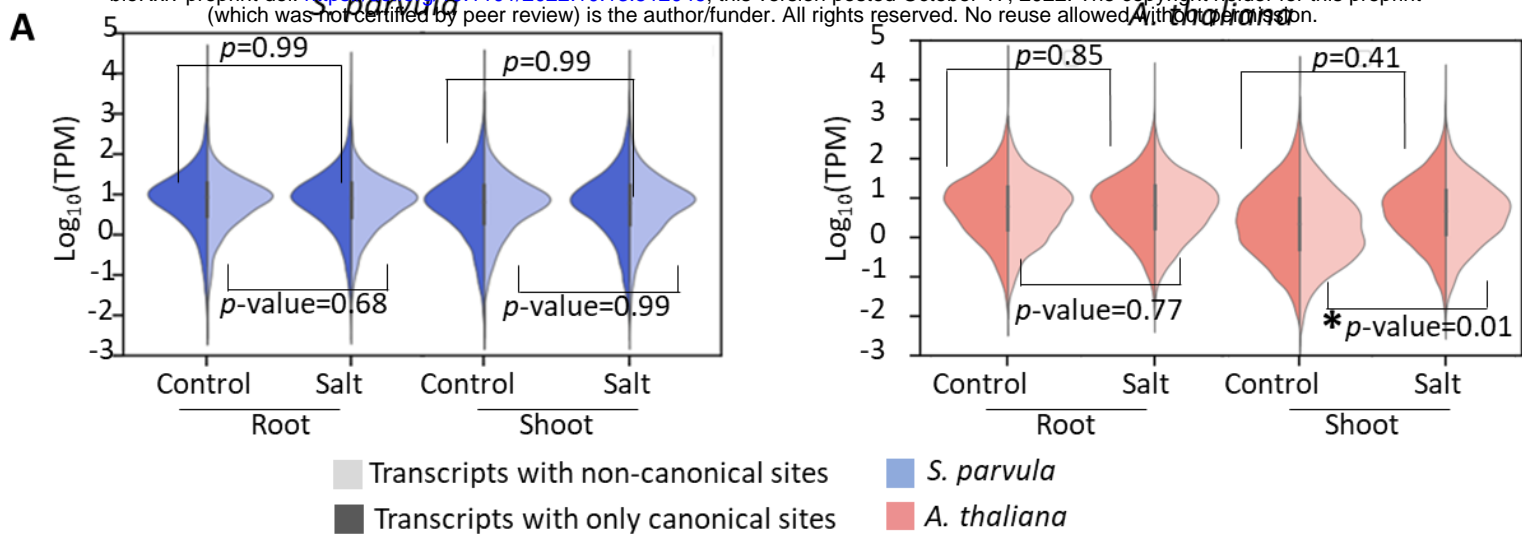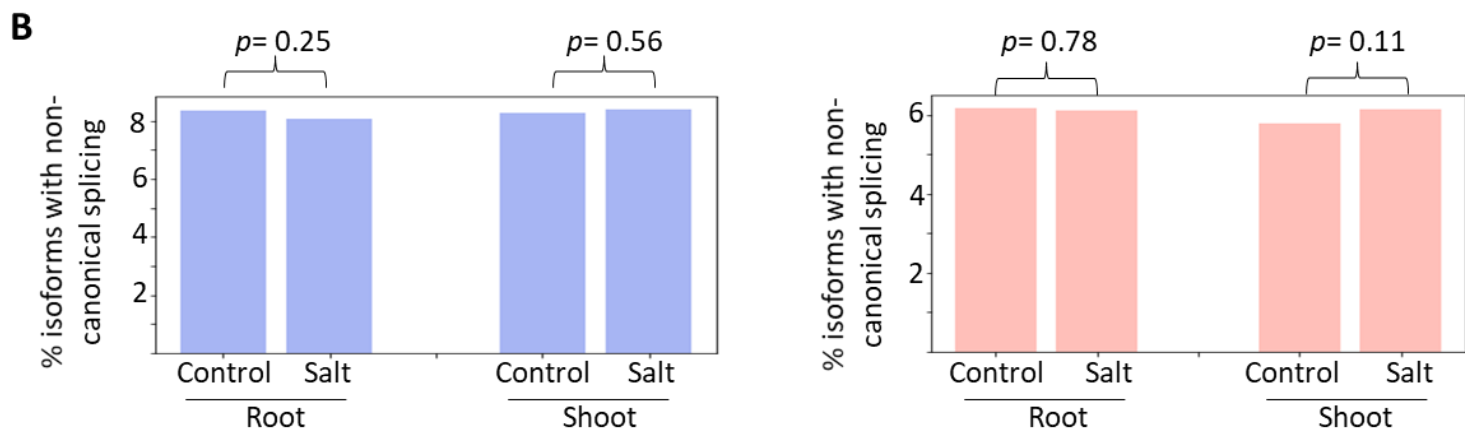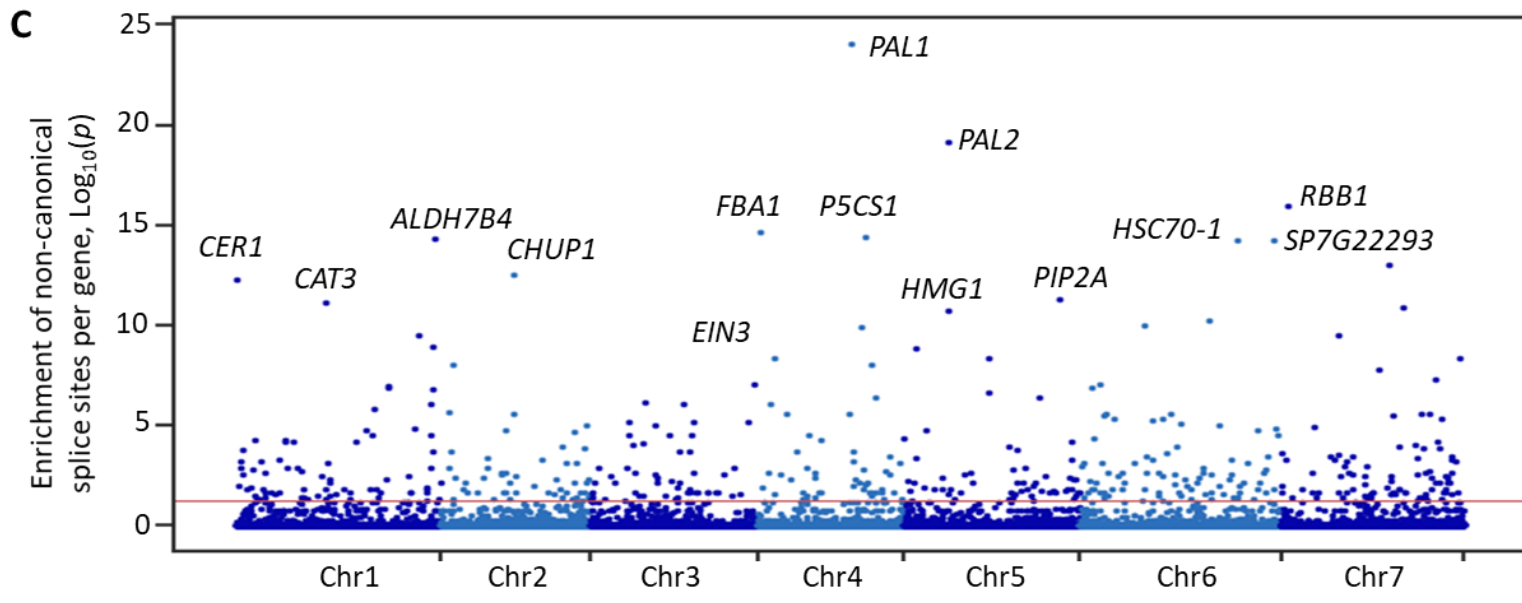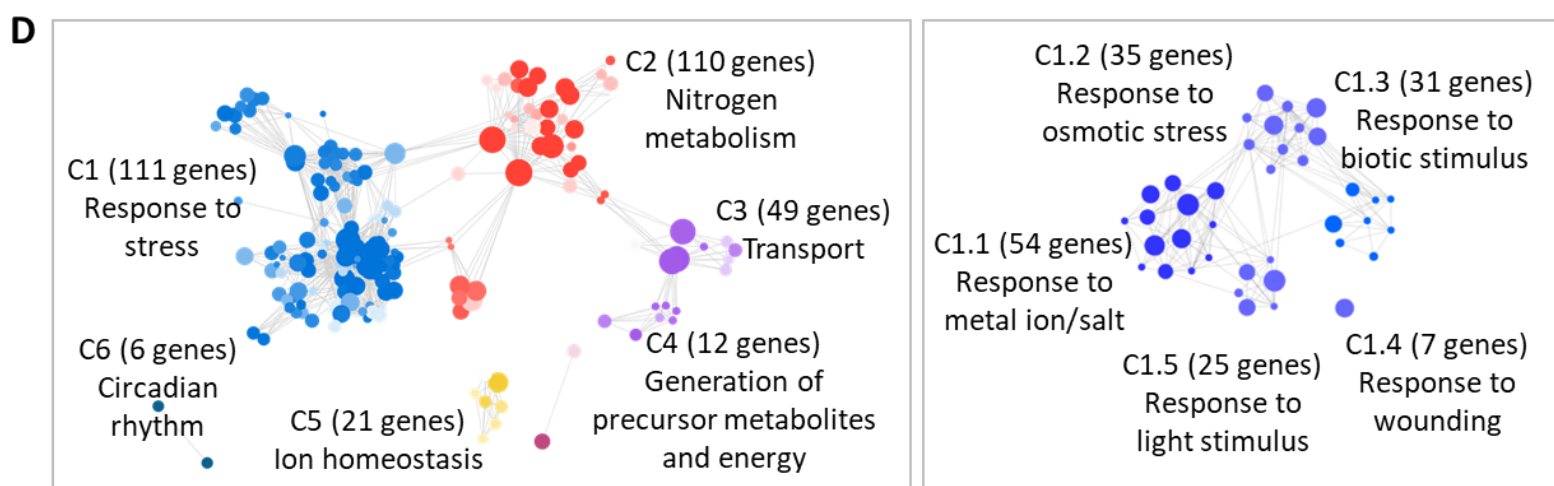

**Figure 5. Use of non-canonical splice sites in transcripts expressed under stress.** **[A]** Expression distribution of transcripts that contain only canonical splice sites and transcripts with at least one non-canonical splice site in roots and shoots of *S. parvula* (left panel) and *A. thaliana* (right panel). Asterisks indicate significant difference of expression distributions between control and salt treated condition measured by two-sided t-test at p-value  $\leq 0.05$ . **[B]** Number of expressed non-canonically spliced transcripts as a % out of total transcripts expressed in *S. parvula* and *A. thaliana* in response to salt. Significant differences between control and stress conditions were tested using Fisher's exact test. **[C]** *S. parvula* genes that were enriched in non-canonical splice sites. The y axis shows the  $-\log_{10}p$ -value for a test of excess of non-canonical splice sites computed using a binomial test, where the probability of enrichment is calculated as the total non-canonical splice sites divided by the total number of splice sites per gene, ordered in the chromosomal order (x-axis) for the *S. parvula* genome. Genes with a high enrichment for non-canonical splicing are labeled. Red line indicates the  $-\log_{10}p$  corresponding to adjusted p-value of 0.05. **[D]** Functional processes enriched in genes detected to be non-canonically spliced in [C]. A node in each cluster represents a gene ontology (GO) term; size of a node represents the number of genes included in that GO term; the clusters that represent similar functions share the same color and are given a representative cluster name and ID; and the edges between nodes show the connectivity of genes between functions. All clusters included in the network have adj p-values  $\leq 0.05$  with false discovery rate correction applied. More significant values are represented by darker node colors. The right panel shows the sub-clustered functions represented by the largest cluster C1 in the left panel.

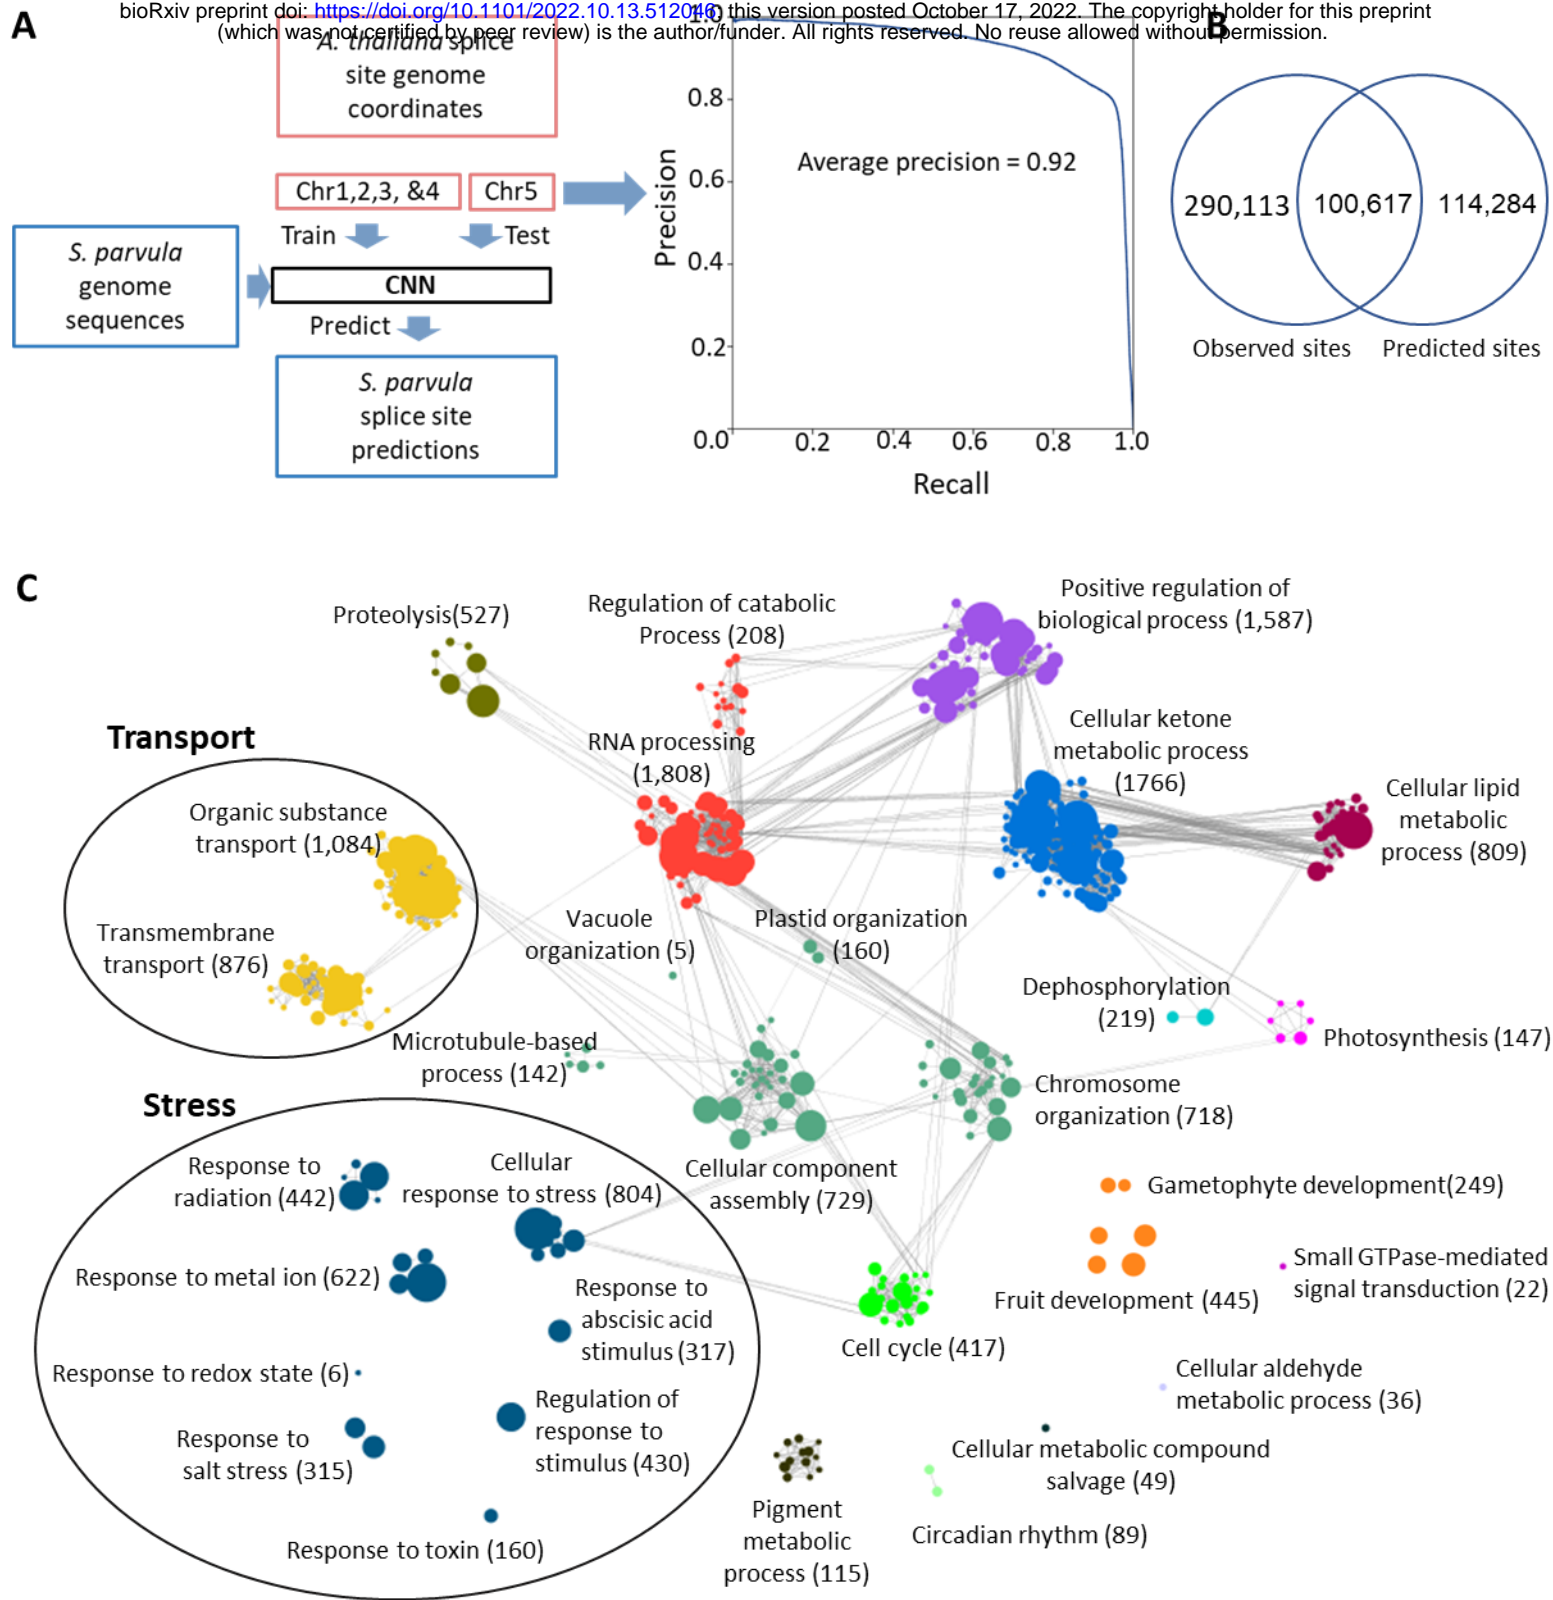

**Figure 6. Genome wide prediction of splice sites for *S. parvula* using a deep neural network. [A]** Training and testing with *A. thaliana* and application of the SpliceAi model to *S. parvula*. **[B]** Overlap between the observed and predicted splice sites for *S. parvula* protein coding gene models. A probability score of  $\geq 0.6$  was used for the predicted splice sites. **[C]** Functional processes enriched in genes observed and predicted to have more than one isoform in the *S. parvula* genome. A node in each cluster represents a gene ontology (GO) term; size of a node represents the number of genes included in that GO term; the clusters that represent similar functions share the same color and are given a representative cluster name; and the edges between nodes show the connectivity of genes between functions. All clusters included in the network have adj p-values  $\leq 0.05$  with false discovery rate correction applied.
